# Supplementary material for: Microbial Community Profile and Water Quality in a Protected Area of the Caatinga Biome
Source: PLoS One. 2016 Feb 16;11(2):e0148296. doi: 10.1371/journal.pone.0148296 (PMC4755664; doi:10.1371/journal.pone.0148296)
Supplement: S3 Table — OTUs were classified at the level of genus using the Greengenes database (May 2013) at 3% dissimilarity performed by QIIME 1.7.0 software. (XLSX) [file pone.0148296.s015.xlsx]

## Sheet: Plan1
S3 Table. Relative abundance of OTUs and sequence information of Paraguaçú River microbiota. OTUs were classified at the level of genus using the Greengenes database (May 2013) at 3% dissimilarity performed by QIIME 1.7.0 software.
Taxonimical groups	P1.Wet.1	P1.Wet.2	P2.Wet.1	P2.Wet.2	P3.Wet.1	P3.Wet.2	P1.Dry.1	P1.Dry.2	P2.Dry.1	P2.Dry.2	P3.Dry.1	P3.Dry.2
k__Archaea	0.0155871	0.0109351	0.00213848	0.000444642	0.000758294	0.00214247	0.00504929	0.00481386	0.00143954	0	0.00316894	0.00234496
Other	0	0.000446329	0	0	0	0	0.000240442	0.000160462	0	0	0	0
Other	0	0.000446329	0	0	0	0	0.000240442	0.000160462	0	0	0	0
Other	0	0.000446329	0	0	0	0	0.000240442	0.000160462	0	0	0	0
Other	0	0.000446329	0	0	0	0	0.000240442	0.000160462	0	0	0	0
Other	0	0.000446329	0	0	0	0	0.000240442	0.000160462	0	0	0	0
p__[Parvarchaeota]	0	0.000446329	6.75311e-05	0	0	0	0	0.000641849	0	0	0.000198059	0
c__[Micrarchaea]	0	0.000446329	6.75311e-05	0	0	0	0	0.000641849	0	0	0.000198059	0
o__[Micrarchaeles]	0	0.000446329	4.50207e-05	0	0	0	0	0.000641849	0	0	0.000198059	0
f__	0	0.000446329	4.50207e-05	0	0	0	0	0.000641849	0	0	0.000198059	0
g__	0	0.000446329	4.50207e-05	0	0	0	0	0.000641849	0	0	0.000198059	0
Other	0	0	2.25104e-05	0	0	0	0	0	0	0	0	0
Other	0	0	2.25104e-05	0	0	0	0	0	0	0	0	0
Other	0	0	2.25104e-05	0	0	0	0	0	0	0	0	0
p__Crenarchaeota	0.0017319	0.00133899	0.000810373	0	0.000379147	0.00187467	0.000480885	0.00112323	0.000159949	0	0.00198059	0.0012959
c__MBGA	0.00034638	0.000669493	0.000540249	0	0.000379147	0.00107124	0	0	0	0	0.000396118	0.00098735
o__NRP-J	0.00034638	0.000669493	0.000540249	0	0.000379147	0.00107124	0	0	0	0	0.000396118	0.00098735
f__	0.00034638	0.000669493	0.000540249	0	0.000379147	0.00107124	0	0	0	0	0.000396118	0.00098735
g__	0.00034638	0.000669493	0.000540249	0	0.000379147	0.00107124	0	0	0	0	0.000396118	0.00098735
c__MCG	0.00103914	0.000223164	9.00414e-05	0	0	0.000267809	0	0.000481386	0	0	0	0
o__	0	0	2.25104e-05	0	0	0	0	0.000160462	0	0	0	0
f__	0	0	2.25104e-05	0	0	0	0	0.000160462	0	0	0	0
g__	0	0	2.25104e-05	0	0	0	0	0.000160462	0	0	0	0
o__pGrfC26	0.00103914	0.000223164	6.75311e-05	0	0	0.000267809	0	0.000320924	0	0	0	0
f__	0.00103914	0.000223164	6.75311e-05	0	0	0.000267809	0	0.000320924	0	0	0	0
g__	0.00103914	0.000223164	6.75311e-05	0	0	0.000267809	0	0.000320924	0	0	0	0
c__Thaumarchaeota	0.00034638	0.000446329	0.000180083	0	0	0.000535619	0.000480885	0.000641849	0.000159949	0	0.00158447	0.000308547
o__Cenarchaeales	0.00034638	0.000446329	0.000180083	0	0	0.000535619	0.000480885	0.000641849	0.000159949	0	0.00158447	0.000308547
f__SAGMA-X	0.00034638	0.000446329	0.000180083	0	0	0.000535619	0.000480885	0.000641849	0.000159949	0	0.00158447	0.000308547
g__	0.00034638	0.000446329	0.000180083	0	0	0.000535619	0.000480885	0.000641849	0.000159949	0	0.00158447	0.000308547
p__Euryarchaeota	0.0138552	0.00870341	0.00126058	0.000444642	0.000379147	0.000267809	0.00432796	0.00288832	0.00127959	0	0.000990295	0.00104906
c__Methanomicrobia	0.0121233	0.00848025	0.00063029	0.000148214	0	0	0.00432796	0.00256739	0.00111964	0	0	0.000123419
o__Methanocellales	0.000692761	0.000446329	2.25104e-05	0	0	0	0.00120221	0	0	0	0	0
f__Methanocellaceae	0.000692761	0.000446329	2.25104e-05	0	0	0	0.00120221	0	0	0	0	0
g__Methanocella	0.000692761	0.000446329	2.25104e-05	0	0	0	0.00120221	0	0	0	0	0
o__Methanomicrobiales	0.00831313	0.00669493	0.00060778	0.000148214	0	0	0.00216398	0.00160462	0.000479846	0	0	0.000123419
f__	0	0.000669493	0	0	0	0	0.000240442	0	0	0	0	0
g__	0	0.000669493	0	0	0	0	0.000240442	0	0	0	0	0
f__Methanoregulaceae	0.00831313	0.00602544	0.000517738	0.000148214	0	0	0.00192354	0.00160462	0.000479846	0	0	0.000123419
g__Candidatus Methanoregula	0.00831313	0.00602544	0.000517738	0.000148214	0	0	0.00192354	0.00160462	0.000479846	0	0	0.000123419
Other	0	0	9.00414e-05	0	0	0	0	0	0	0	0	0
Other	0	0	9.00414e-05	0	0	0	0	0	0	0	0	0
o__Methanosarcinales	0.00311742	0.00133899	0	0	0	0	0.00096177	0.000962773	0.000639795	0	0	0
f__ANME-2D	0	0.000223164	0	0	0	0	0.000480885	0.000160462	0	0	0	0
g__	0	0.000223164	0	0	0	0	0.000480885	0.000160462	0	0	0	0
f__Methanosaetaceae	0.00277104	0.00111582	0	0	0	0	0.000480885	0.000320924	0	0	0	0
g__Methanosaeta	0.00277104	0.00111582	0	0	0	0	0.000480885	0.000320924	0	0	0	0
f__Methanosarcinaceae	0.00034638	0	0	0	0	0	0	0.000481386	0.000639795	0	0	0
g__Methanimicrococcus	0	0	0	0	0	0	0	0	0.000639795	0	0	0
g__Methanosarcina	0.00034638	0	0	0	0	0	0	0.000481386	0	0	0	0
c__Thermoplasmata	0.000692761	0	0.00063029	0.000296428	0.000379147	0.000267809	0	0.000160462	0.000159949	0	0.000990295	0.00092564
o__E2	0.000692761	0	0.00063029	0.000296428	0.000379147	0.000267809	0	0.000160462	0.000159949	0	0.000990295	0.000863931
f__	0.00034638	0	0	0	0	0	0	0	0	0	0.000396118	0
g__	0.00034638	0	0	0	0	0	0	0	0	0	0.000396118	0
f__[Methanomassiliicoccaceae]	0.00034638	0	0.00063029	0.000296428	0.000379147	0.000267809	0	0.000160462	0.000159949	0	0.000594177	0.000863931
g__	0.00034638	0	0.00063029	0.000296428	0.000379147	0.000267809	0	0.000160462	0.000159949	0	0.000594177	0.000863931
Other	0	0	0	0	0	0	0	0	0	0	0	6.17093e-05
Other	0	0	0	0	0	0	0	0	0	0	0	6.17093e-05
Other	0	0	0	0	0	0	0	0	0	0	0	6.17093e-05
Other	0.00103914	0.000223164	0	0	0	0	0	0.000160462	0	0	0	0
Other	0.00103914	0.000223164	0	0	0	0	0	0.000160462	0	0	0	0
Other	0.00103914	0.000223164	0	0	0	0	0	0.000160462	0	0	0	0
Other	0.00103914	0.000223164	0	0	0	0	0	0.000160462	0	0	0	0
k__Bacteria	0.984413	0.989065	0.997839	0.999555	0.999242	0.997858	0.994951	0.995186	0.99856	1	0.996831	0.997655
Other	0.00381018	0.00580228	0.00893661	0.00222321	0.00113744	0.00187467	0.00264487	0.00288832	0.00527831	0.00219419	0.0110913	0.00431965
Other	0.00381018	0.00580228	0.00893661	0.00222321	0.00113744	0.00187467	0.00264487	0.00288832	0.00527831	0.00219419	0.0110913	0.00431965
Other	0.00381018	0.00580228	0.00893661	0.00222321	0.00113744	0.00187467	0.00264487	0.00288832	0.00527831	0.00219419	0.0110913	0.00431965
Other	0.00381018	0.00580228	0.00893661	0.00222321	0.00113744	0.00187467	0.00264487	0.00288832	0.00527831	0.00219419	0.0110913	0.00431965
Other	0.00381018	0.00580228	0.00893661	0.00222321	0.00113744	0.00187467	0.00264487	0.00288832	0.00527831	0.00219419	0.0110913	0.00431965
p__	0	0	0	0	0	0	0.000240442	0.000320924	0	0	0	0
c__	0	0	0	0	0	0	0.000240442	0.000320924	0	0	0	0
o__	0	0	0	0	0	0	0.000240442	0.000320924	0	0	0	0
f__	0	0	0	0	0	0	0.000240442	0.000320924	0	0	0	0
g__	0	0	0	0	0	0	0.000240442	0.000320924	0	0	0	0
p__[Thermi]	0	0	0	0	0.00056872	0	0	0.000160462	0	0	0.000396118	6.17093e-05
c__Deinococci	0	0	0	0	0.00056872	0	0	0.000160462	0	0	0.000396118	6.17093e-05
o__Deinococcales	0	0	0	0	0.000379147	0	0	0.000160462	0	0	0.000396118	6.17093e-05
f__Deinococcaceae	0	0	0	0	0.000379147	0	0	0.000160462	0	0	0.000396118	6.17093e-05
g__Deinococcus	0	0	0	0	0.000379147	0	0	0.000160462	0	0	0.000396118	6.17093e-05
o__Thermales	0	0	0	0	0.000189573	0	0	0	0	0	0	0
f__Thermaceae	0	0	0	0	0.000189573	0	0	0	0	0	0	0
g__Meiothermus	0	0	0	0	0.000189573	0	0	0	0	0	0	0
p__AC1	0.00138552	0.000669493	0	0	0	0	0.000240442	0.000320924	0	0	0	0
c__	0.00034638	0.000446329	0	0	0	0	0	0	0	0	0	0
o__	0.00034638	0.000446329	0	0	0	0	0	0	0	0	0	0
f__	0.00034638	0.000446329	0	0	0	0	0	0	0	0	0	0
g__	0.00034638	0.000446329	0	0	0	0	0	0	0	0	0	0
c__HDBW-WB69	0.00103914	0.000223164	0	0	0	0	0	0.000320924	0	0	0	0
o__	0.00103914	0.000223164	0	0	0	0	0	0.000320924	0	0	0	0
f__	0.00103914	0.000223164	0	0	0	0	0	0.000320924	0	0	0	0
g__	0.00103914	0.000223164	0	0	0	0	0	0.000320924	0	0	0	0
Other	0	0	0	0	0	0	0.000240442	0	0	0	0	0
Other	0	0	0	0	0	0	0.000240442	0	0	0	0	0
Other	0	0	0	0	0	0	0.000240442	0	0	0	0	0
Other	0	0	0	0	0	0	0.000240442	0	0	0	0	0
p__Acidobacteria	0.0176654	0.0158447	0.0709751	0.026975	0.0106161	0.0200857	0.00601106	0.00866496	0.0510237	0.0202962	0.0903149	0.0338784
c__[Chloracidobacteria]	0.00034638	0.000446329	0.000450207	0.000296428	0	0.000267809	0	0.000320924	0.000159949	0	0.000198059	0.000185128
o__11-24	0	0	0.000112552	0	0	0	0	0	0	0	0	0
f__	0	0	0.000112552	0	0	0	0	0	0	0	0	0
g__	0	0	0.000112552	0	0	0	0	0	0	0	0	0
o__Ellin7246	0	0	2.25104e-05	0	0	0	0	0	0	0	0	0.000123419
f__	0	0	2.25104e-05	0	0	0	0	0	0	0	0	0.000123419
g__	0	0	2.25104e-05	0	0	0	0	0	0	0	0	0.000123419
o__RB41	0.00034638	0.000446329	0.000315145	0.000296428	0	0.000267809	0	0.000320924	0.000159949	0	0.000198059	6.17093e-05
f__	0.00034638	0.000446329	0.000315145	0.000296428	0	0.000267809	0	0	0.000159949	0	0.000198059	6.17093e-05
g__	0.00034638	0.000446329	0.000315145	0.000296428	0	0.000267809	0	0	0.000159949	0	0.000198059	6.17093e-05
f__Ellin6075	0	0	0	0	0	0	0	0.000320924	0	0	0	0
g__	0	0	0	0	0	0	0	0.000320924	0	0	0	0
c__Acidobacteria-5	0	0.000669493	0.00144066	0.000148214	0.00056872	0.00107124	0	0.000320924	0.00127959	0.000182849	0.00237671	0.00098735
o__	0	0.000669493	0.00144066	0.000148214	0.00056872	0.00107124	0	0.000320924	0.00127959	0.000182849	0.00237671	0.00098735
f__	0	0.000669493	0.00144066	0.000148214	0.00056872	0.00107124	0	0.000320924	0.00127959	0.000182849	0.00237671	0.00098735
g__	0	0.000669493	0.00144066	0.000148214	0.00056872	0.00107124	0	0.000320924	0.00127959	0.000182849	0.00237671	0.00098735
c__Acidobacteria-6	0.0034638	0.00245481	0.00605529	0.002075	0.00265403	0.005624	0.00264487	0.00208601	0.00575816	0.00127994	0.0120816	0.00401111
o__CCU21	0.00034638	0	0.000112552	0.000296428	0	0	0	0	0	0	0.000198059	0
f__	0.00034638	0	0.000112552	0.000296428	0	0	0	0	0	0	0.000198059	0
g__	0.00034638	0	0.000112552	0.000296428	0	0	0	0	0	0	0.000198059	0
o__iii1-15	0.00311742	0.00245481	0.00594273	0.00177857	0.00265403	0.005624	0.00264487	0.00208601	0.00575816	0.00127994	0.0118835	0.00401111
f__	0.00311742	0.00245481	0.00556006	0.00148214	0.00189573	0.00401714	0.00216398	0.00192555	0.00511836	0.00127994	0.010101	0.00370256
g__	0.00311742	0.00245481	0.00556006	0.00148214	0.00189573	0.00401714	0.00216398	0.00192555	0.00511836	0.00127994	0.010101	0.00370256
f__RB40	0	0	0.000180083	0.000296428	0.00056872	0.00160686	0.000480885	0.000160462	0	0	0.000792236	0.000246837
g__	0	0	0.000180083	0.000296428	0.00056872	0.00160686	0.000480885	0.000160462	0	0	0.000792236	0.000246837
Other	0	0	0.000202593	0	0.000189573	0	0	0	0.000639795	0	0.000990295	6.17093e-05
Other	0	0	0.000202593	0	0.000189573	0	0	0	0.000639795	0	0.000990295	6.17093e-05
c__Acidobacteriia	0.00242466	0.00357063	0.039078	0.0151178	0.00303318	0.00508838	0.0016831	0.00288832	0.0263916	0.0100567	0.0433749	0.0161678
o__Acidobacteriales	0.00242466	0.00357063	0.039078	0.0151178	0.00303318	0.00508838	0.0016831	0.00288832	0.0263916	0.0100567	0.0433749	0.0161678
f__Acidobacteriaceae	0.000692761	0.000892658	0.00893661	0.00726249	0.00132701	0.00214247	0	0.000320924	0.00543826	0.00292558	0.00930877	0.00345572
g__	0.000692761	0.000669493	0.00513236	0.00563213	0.000758294	0.00187467	0	0	0.00287908	0.00201134	0.00475342	0.00228325
g__Acidobacterium	0	0	0.000112552	0	0	0	0	0	0	0	0	6.17093e-05
g__Edaphobacter	0	0	2.25104e-05	0	0	0	0	0	0	0	0	6.17093e-05
Other	0	0.000223164	0.00366919	0.00163035	0.00056872	0.000267809	0	0.000320924	0.00255918	0.000914244	0.00455536	0.00104906
f__Koribacteraceae	0.00138552	0.00245481	0.0295561	0.00785534	0.00170616	0.0029459	0.0016831	0.00256739	0.0206334	0.00694825	0.0330759	0.0122802
g__	0.00103914	0.00111582	0.0217	0.00652142	0.00170616	0.00241028	0.0016831	0.00208601	0.0164747	0.00475407	0.0283224	0.0103672
g__Candidatus Koribacter	0.00034638	0.00111582	0.00706825	0.00118571	0	0	0	0.000481386	0.00367882	0.00201134	0.0043573	0.00154273
Other	0	0.000223164	0.000787862	0.000148214	0	0.000535619	0	0	0.000479846	0.000182849	0.000396118	0.000370256
Other	0.00034638	0.000223164	0.000585269	0	0	0	0	0	0.000319898	0.000182849	0.000990295	0.000431965
Other	0.00034638	0.000223164	0.000585269	0	0	0	0	0	0.000319898	0.000182849	0.000990295	0.000431965
c__BPC102	0.000692761	0.000892658	0.000135062	0.000148214	0	0	0.000721327	0.000320924	0	0	0	0
o__	0	0.000223164	0	0	0	0	0	0	0	0	0	0
f__	0	0.000223164	0	0	0	0	0	0	0	0	0	0
g__	0	0.000223164	0	0	0	0	0	0	0	0	0	0
o__MVS-40	0.000692761	0.000669493	0.000135062	0.000148214	0	0	0.000721327	0.000320924	0	0	0	0
f__	0.000692761	0.000669493	0.000135062	0.000148214	0	0	0.000721327	0.000320924	0	0	0	0
g__	0.000692761	0.000669493	0.000135062	0.000148214	0	0	0.000721327	0.000320924	0	0	0	0
c__DA052	0.00138552	0.00133899	0.00855393	0.00311249	0.000947867	0.00187467	0	0.000962773	0.00495841	0.000914244	0.0122797	0.00376427
o__Ellin6513	0.00138552	0.00133899	0.00855393	0.00311249	0.000947867	0.00187467	0	0.000962773	0.00495841	0.000914244	0.0122797	0.00376427
f__	0.00138552	0.00133899	0.00855393	0.00311249	0.000947867	0.00187467	0	0.000962773	0.00495841	0.000914244	0.0122797	0.00376427
g__	0.00138552	0.00133899	0.00855393	0.00311249	0.000947867	0.00187467	0	0.000962773	0.00495841	0.000914244	0.0122797	0.00376427
c__EC1113	0.00034638	0	9.00414e-05	0	0.000189573	0.000267809	0	0.000160462	0	0	0.000396118	0.000185128
o__	0.00034638	0	9.00414e-05	0	0.000189573	0.000267809	0	0.000160462	0	0	0.000396118	0.000185128
f__	0.00034638	0	9.00414e-05	0	0.000189573	0.000267809	0	0.000160462	0	0	0.000396118	0.000185128
g__	0.00034638	0	9.00414e-05	0	0.000189573	0.000267809	0	0.000160462	0	0	0.000396118	0.000185128
c__Holophagae	0.00588847	0.00357063	0.00060778	0.000296428	0.00056872	0.000267809	0	0.000802311	0.00319898	0.00329128	0	0.000123419
o__Holophagales	0.00588847	0.00357063	0.00060778	0.000296428	0.00056872	0.000267809	0	0.000802311	0.00319898	0.00329128	0	0.000123419
f__Holophagaceae	0.00588847	0.00357063	0.00060778	0.000296428	0.00056872	0.000267809	0	0.000802311	0.00319898	0.00329128	0	0.000123419
g__	0.00138552	0.000669493	0.000427697	0.000148214	0.000379147	0.000267809	0	0.000641849	0.00287908	0.00292558	0	6.17093e-05
g__Geothrix	0.00450294	0.00290114	0.000180083	0.000148214	0.000189573	0	0	0.000160462	0.000319898	0.000365698	0	6.17093e-05
c__iii1-8	0	0.000446329	0.000225104	0.000148214	0	0.000267809	0	0	0	0	0	0.000123419
o__32-20	0	0.000446329	0	0	0	0	0	0	0	0	0	0.000123419
f__	0	0.000446329	0	0	0	0	0	0	0	0	0	0.000123419
g__	0	0.000446329	0	0	0	0	0	0	0	0	0	0.000123419
o__DS-18	0	0	0.000225104	0.000148214	0	0	0	0	0	0	0	0
f__	0	0	0.000225104	0.000148214	0	0	0	0	0	0	0	0
g__	0	0	0.000225104	0.000148214	0	0	0	0	0	0	0	0
o__SJA-36	0	0	0	0	0	0.000267809	0	0	0	0	0	0
f__	0	0	0	0	0	0.000267809	0	0	0	0	0	0
g__	0	0	0	0	0	0.000267809	0	0	0	0	0	0
c__OS-K	0	0	2.25104e-05	0	0	0	0	0	0	0	0	0
o__	0	0	2.25104e-05	0	0	0	0	0	0	0	0	0
f__	0	0	2.25104e-05	0	0	0	0	0	0	0	0	0
g__	0	0	2.25104e-05	0	0	0	0	0	0	0	0	0
c__PAUC37f	0	0.000223164	0	0	0	0	0	0	0	0	0	0
o__	0	0.000223164	0	0	0	0	0	0	0	0	0	0
f__	0	0.000223164	0	0	0	0	0	0	0	0	0	0
g__	0	0.000223164	0	0	0	0	0	0	0	0	0	0
c__Solibacteres	0.00311742	0.00200848	0.0122907	0.00474285	0.00265403	0.00508838	0.00096177	0.000802311	0.00815739	0.00402267	0.0180234	0.00752854
o__JH-WHS99	0	0	0.000135062	0	0.000189573	0	0	0	0	0	0	6.17093e-05
f__	0	0	0.000135062	0	0.000189573	0	0	0	0	0	0	6.17093e-05
g__	0	0	0.000135062	0	0.000189573	0	0	0	0	0	0	6.17093e-05
o__Solibacterales	0.00311742	0.00200848	0.0121556	0.00474285	0.00246445	0.00508838	0.00096177	0.000802311	0.00815739	0.00402267	0.0180234	0.00746683
f__	0.00034638	0.000446329	0.00301639	0.00074107	0.00132701	0.000535619	0.000240442	0	0.00111964	0.000365698	0.00297089	0.00191299
g__	0.00034638	0.000446329	0.00301639	0.00074107	0.00132701	0.000535619	0.000240442	0	0.00111964	0.000365698	0.00297089	0.00191299
f__MVS-65	0	0	4.50207e-05	0	0	0	0	0	0	0	0	0
g__	0	0	4.50207e-05	0	0	0	0	0	0	0	0	0
f__Solibacteraceae	0.00242466	0.00133899	0.00799118	0.00400178	0.00113744	0.00455276	0.000721327	0.000802311	0.00639795	0.00365698	0.0140622	0.00536871
g__	0.00034638	0.000223164	0.00200342	0.0010375	0.000379147	0.000803428	0.000240442	0.000802311	0.00271913	0.00127994	0.00277283	0.00178957
g__Candidatus Solibacter	0.00207828	0.00111582	0.00598775	0.00296428	0.000758294	0.00374933	0.000480885	0	0.00367882	0.00237703	0.0112894	0.00357914
Other	0.00034638	0.000223164	0.00110301	0	0	0	0	0	0.000639795	0	0.000990295	0.000185128
Other	0.00034638	0.000223164	0.00110301	0	0	0	0	0	0.000639795	0	0.000990295	0.000185128
c__Sva0725	0	0	0.000157572	0.000148214	0	0	0	0	0	0	0.000396118	6.17093e-05
o__Sva0725	0	0	0.000157572	0.000148214	0	0	0	0	0	0	0.000396118	6.17093e-05
f__	0	0	0.000157572	0.000148214	0	0	0	0	0	0	0.000396118	6.17093e-05
g__	0	0	0.000157572	0.000148214	0	0	0	0	0	0	0.000396118	6.17093e-05
c__TM1	0	0.000223164	0.000922925	0.00074107	0	0.000267809	0	0	0.000319898	0	0.000198059	0.000678803
o__	0	0.000223164	0.000922925	0.00074107	0	0.000267809	0	0	0.000319898	0	0.000198059	0.000678803
f__	0	0.000223164	0.000922925	0.00074107	0	0.000267809	0	0	0.000319898	0	0.000198059	0.000678803
g__	0	0.000223164	0.000922925	0.00074107	0	0.000267809	0	0	0.000319898	0	0.000198059	0.000678803
Other	0	0	0.000945435	0	0	0	0	0	0.000799744	0.000548546	0.000990295	6.17093e-05
Other	0	0	0.000945435	0	0	0	0	0	0.000799744	0.000548546	0.000990295	6.17093e-05
Other	0	0	0.000945435	0	0	0	0	0	0.000799744	0.000548546	0.000990295	6.17093e-05
Other	0	0	0.000945435	0	0	0	0	0	0.000799744	0.000548546	0.000990295	6.17093e-05
p__Actinobacteria	0.027364	0.0194153	0.0442103	0.076182	0.0274882	0.0468666	0.0454436	0.0426829	0.0291107	0.0349241	0.0138641	0.0138846
c__Acidimicrobiia	0.00103914	0.000446329	0.0334504	0.0486142	0.0172512	0.0232994	0.000480885	0.000802311	0.0254319	0.0294387	0.00633789	0.00752854
o__Acidimicrobiales	0.00103914	0.000446329	0.0334504	0.0486142	0.0172512	0.0232994	0.000480885	0.000802311	0.0254319	0.0294387	0.00633789	0.00752854
f__	0.000692761	0.000446329	0.0334504	0.0486142	0.0172512	0.0232994	0.000480885	0.000802311	0.0254319	0.0294387	0.00633789	0.00752854
g__	0.000692761	0.000446329	0.0334504	0.0486142	0.0172512	0.0232994	0.000480885	0.000802311	0.0254319	0.0294387	0.00633789	0.00752854
f__C111	0.00034638	0	0	0	0	0	0	0	0	0	0	0
g__	0.00034638	0	0	0	0	0	0	0	0	0	0	0
c__Actinobacteria	0.0256321	0.0182995	0.00990456	0.0272714	0.0100474	0.0235672	0.0447223	0.0415597	0.00303903	0.00548546	0.00633789	0.00561555
o__Actinomycetales	0.0256321	0.0182995	0.00990456	0.0272714	0.0100474	0.0235672	0.0447223	0.0415597	0.00303903	0.00548546	0.00633789	0.00561555
f__	0	0	9.00414e-05	0	0	0	0	0	0	0	0	0
g__	0	0	9.00414e-05	0	0	0	0	0	0	0	0	0
f__ACK-M1	0.00034638	0.00245481	0.00940933	0.0272714	0.00985782	0.0235672	0.00264487	0.00288832	0.00303903	0.00493692	0.00574371	0.00543042
g__	0.00034638	0.00245481	0.00940933	0.0272714	0.00985782	0.0235672	0.00264487	0.00288832	0.00303903	0.00493692	0.00574371	0.00543042
f__Actinospicaceae	0	0	0	0	0	0	0	0	0	0.000182849	0	0
g__	0	0	0	0	0	0	0	0	0	0.000182849	0	0
f__Microbacteriaceae	0.0252858	0.0158447	0.000112552	0	0	0	0.0420774	0.0386714	0	0	0.000396118	0.000123419
g__Candidatus Rhodoluna	0.0232075	0.014952	0.000112552	0	0	0	0.037509	0.0346598	0	0	0.000396118	6.17093e-05
Other	0.00207828	0.000892658	0	0	0	0	0.00456841	0.00401155	0	0	0	6.17093e-05
f__Micromonosporaceae	0	0	0	0	0	0	0	0	0	0	0	6.17093e-05
g__	0	0	0	0	0	0	0	0	0	0	0	6.17093e-05
f__Mycobacteriaceae	0	0	0.000202593	0	0.000189573	0	0	0	0	0	0.000198059	0
g__Mycobacterium	0	0	0.000202593	0	0.000189573	0	0	0	0	0	0.000198059	0
f__Propionibacteriaceae	0	0	2.25104e-05	0	0	0	0	0	0	0	0	0
g__Propionibacterium	0	0	2.25104e-05	0	0	0	0	0	0	0	0	0
f__Pseudonocardiaceae	0	0	2.25104e-05	0	0	0	0	0	0	0.000182849	0	0
g__	0	0	2.25104e-05	0	0	0	0	0	0	0	0	0
g__Pseudonocardia	0	0	0	0	0	0	0	0	0	0.000182849	0	0
Other	0	0	4.50207e-05	0	0	0	0	0	0	0.000182849	0	0
Other	0	0	4.50207e-05	0	0	0	0	0	0	0.000182849	0	0
c__OPB41	0	0	0	0	0	0	0	0.000320924	0	0	0	0
o__	0	0	0	0	0	0	0	0.000320924	0	0	0	0
f__	0	0	0	0	0	0	0	0.000320924	0	0	0	0
g__	0	0	0	0	0	0	0	0.000320924	0	0	0	0
c__Thermoleophilia	0.000692761	0.000669493	0.000697821	0.000148214	0.000189573	0	0.000240442	0	0.000319898	0	0.000990295	0.000740512
o__	0	0.000223164	0	0	0	0	0	0	0	0	0	0
f__	0	0.000223164	0	0	0	0	0	0	0	0	0	0
g__	0	0.000223164	0	0	0	0	0	0	0	0	0	0
o__Gaiellales	0	0.000223164	0	0	0	0	0	0	0	0	0	0
f__Gaiellaceae	0	0.000223164	0	0	0	0	0	0	0	0	0	0
g__	0	0.000223164	0	0	0	0	0	0	0	0	0	0
o__Solirubrobacterales	0.000692761	0.000223164	0.000697821	0.000148214	0.000189573	0	0.000240442	0	0.000319898	0	0.000990295	0.000740512
f__Conexibacteraceae	0.000692761	0.000223164	0.000697821	0.000148214	0.000189573	0	0.000240442	0	0.000319898	0	0.000990295	0.000740512
g__	0.000692761	0.000223164	0.000697821	0.000148214	0.000189573	0	0.000240442	0	0.000319898	0	0.000990295	0.000678803
g__Conexibacter	0	0	0	0	0	0	0	0	0	0	0	6.17093e-05
Other	0	0	0.000157572	0.000148214	0	0	0	0	0.000319898	0	0.000198059	0
Other	0	0	0.000157572	0.000148214	0	0	0	0	0.000319898	0	0.000198059	0
Other	0	0	0.000157572	0.000148214	0	0	0	0	0.000319898	0	0.000198059	0
Other	0	0	0.000157572	0.000148214	0	0	0	0	0.000319898	0	0.000198059	0
p__AD3	0	0.000223164	0.00346659	0.000296428	0	0	0.000240442	0.000320924	0.00271913	0.000548546	0.00495148	0.00135761
c__ABS-6	0	0.000223164	0.00344408	0.000296428	0	0	0.000240442	0.000320924	0.00271913	0.000548546	0.00495148	0.00135761
o__	0	0.000223164	0.00344408	0.000296428	0	0	0.000240442	0.000320924	0.00271913	0.000548546	0.00495148	0.00135761
f__	0	0.000223164	0.00344408	0.000296428	0	0	0.000240442	0.000320924	0.00271913	0.000548546	0.00495148	0.00135761
g__	0	0.000223164	0.00344408	0.000296428	0	0	0.000240442	0.000320924	0.00271913	0.000548546	0.00495148	0.00135761
c__JG37-AG-4	0	0	2.25104e-05	0	0	0	0	0	0	0	0	0
o__	0	0	2.25104e-05	0	0	0	0	0	0	0	0	0
f__	0	0	2.25104e-05	0	0	0	0	0	0	0	0	0
g__	0	0	2.25104e-05	0	0	0	0	0	0	0	0	0
p__Armatimonadetes	0.00034638	0.000446329	0.00227355	0.00266785	0.00322275	0.005624	0	0.000160462	0.00959693	0.0111538	0.00356506	0.0026535
c__[Fimbriimonadia]	0	0.000223164	0.00155321	0.00222321	0.00208531	0.00455276	0	0	0.00895713	0.0104224	0.00198059	0.00178957
o__[Fimbriimonadales]	0	0	0.00155321	0.00222321	0.00208531	0.00455276	0	0	0.00895713	0.0104224	0.00198059	0.00178957
f__[Fimbriimonadaceae]	0	0	0.00155321	0.00222321	0.00208531	0.00455276	0	0	0.00895713	0.0104224	0.00198059	0.00178957
g__Fimbriimonas	0	0	0.0013056	0.002075	0.00170616	0.00428495	0	0	0.00895713	0.0104224	0.00158447	0.00166615
Other	0	0	0.000247614	0.000148214	0.000379147	0.000267809	0	0	0	0	0.000396118	0.000123419
Other	0	0.000223164	0	0	0	0	0	0	0	0	0	0
Other	0	0.000223164	0	0	0	0	0	0	0	0	0	0
Other	0	0.000223164	0	0	0	0	0	0	0	0	0	0
c__0319-6E2	0	0	0	0	0	0	0	0	0	0	0	0.000123419
o__	0	0	0	0	0	0	0	0	0	0	0	0.000123419
f__	0	0	0	0	0	0	0	0	0	0	0	0.000123419
g__	0	0	0	0	0	0	0	0	0	0	0	0.000123419
c__Armatimonadia	0	0	0.000157572	0	0.00056872	0.000535619	0	0	0.000159949	0.000365698	0.000396118	0.000431965
o__Armatimonadales	0	0	0.000112552	0	0.00056872	0.000267809	0	0	0	0.000365698	0	0.000185128
f__Armatimonadaceae	0	0	0.000112552	0	0.00056872	0.000267809	0	0	0	0.000365698	0	0.000185128
g__	0	0	0.000112552	0	0.00056872	0.000267809	0	0	0	0.000365698	0	0.000185128
o__FW68	0	0	4.50207e-05	0	0	0.000267809	0	0	0.000159949	0	0.000396118	0.000246837
f__	0	0	4.50207e-05	0	0	0.000267809	0	0	0.000159949	0	0.000396118	0.000246837
g__	0	0	4.50207e-05	0	0	0.000267809	0	0	0.000159949	0	0.000396118	0.000246837
c__Chthonomonadetes	0	0.000223164	0.000540249	0.000296428	0.00056872	0.000535619	0	0	0.000479846	0.000365698	0.00118835	0.000308547
o__Chthonomonadales	0	0	0.000517738	0.000296428	0.00056872	0.000535619	0	0	0.000479846	0.000365698	0.00118835	0.000308547
f__Chthonomonadaceae	0	0	0.000517738	0.000296428	0.00056872	0.000535619	0	0	0.000479846	0.000365698	0.00118835	0.000308547
g__	0	0	0.000472717	0.000148214	0.00056872	0.000535619	0	0	0.000479846	0.000365698	0.000990295	0.000308547
Other	0	0	4.50207e-05	0.000148214	0	0	0	0	0	0	0.000198059	0
o__SJA-22	0	0.000223164	2.25104e-05	0	0	0	0	0	0	0	0	0
f__	0	0.000223164	2.25104e-05	0	0	0	0	0	0	0	0	0
g__	0	0.000223164	2.25104e-05	0	0	0	0	0	0	0	0	0
c__SJA-176	0.00034638	0	0	0	0	0	0	0.000160462	0	0	0	0
o__RB046	0.00034638	0	0	0	0	0	0	0.000160462	0	0	0	0
f__	0.00034638	0	0	0	0	0	0	0.000160462	0	0	0	0
g__	0.00034638	0	0	0	0	0	0	0.000160462	0	0	0	0
Other	0	0	2.25104e-05	0.000148214	0	0	0	0	0	0	0	0
Other	0	0	2.25104e-05	0.000148214	0	0	0	0	0	0	0	0
Other	0	0	2.25104e-05	0.000148214	0	0	0	0	0	0	0	0
Other	0	0	2.25104e-05	0.000148214	0	0	0	0	0	0	0	0
p__Bacteroidetes	0.0207828	0.0151752	0.00486224	0.00785534	0.00872038	0.00990894	0.0211589	0.0179718	0.0129559	0.0126166	0.0087146	0.00759025
c__[Saprospirae]	0.0124697	0.00937291	0.00234108	0.00163035	0.00208531	0.00348152	0.0153883	0.0133184	0.00911708	0.00767965	0.00297089	0.00290034
o__[Saprospirales]	0.0124697	0.00937291	0.00234108	0.00163035	0.00208531	0.00348152	0.0153883	0.0133184	0.00911708	0.00767965	0.00297089	0.00290034
f__	0	0	0.000157572	0	0.000189573	0	0.000240442	0.000160462	0.000159949	0.000182849	0	0.000246837
g__	0	0	0.000157572	0	0.000189573	0	0.000240442	0.000160462	0.000159949	0.000182849	0	0.000246837
f__Chitinophagaceae	0.0121233	0.00937291	0.00216099	0.00163035	0.00189573	0.00348152	0.0151479	0.0131579	0.00895713	0.0074968	0.00297089	0.0026535
g__	0.00138552	0.00111582	0.00141815	0.00074107	0.00132701	0.00133905	0	0	0.00127959	0.000914244	0.00178253	0.00160444
g__Sediminibacterium	0.0107378	0.00825709	0.000360166	0.00074107	0.000379147	0.000267809	0.0151479	0.0129974	0.00767754	0.00658256	0.000792236	0.00104906
Other	0	0	0.000382676	0.000148214	0.000189573	0.00187467	0	0.000160462	0	0	0.000396118	0
f__Saprospiraceae	0.00034638	0	0	0	0	0	0	0	0	0	0	0
g__Haliscomenobacter	0.00034638	0	0	0	0	0	0	0	0	0	0	0
Other	0	0	2.25104e-05	0	0	0	0	0	0	0	0	0
Other	0	0	2.25104e-05	0	0	0	0	0	0	0	0	0
c__Bacteroidia	0.0051957	0.0031243	0.000157572	0.000444642	0.000379147	0.000267809	0.00144265	0.000481386	0.000159949	0.000182849	0.000594177	0.000185128
o__Bacteroidales	0.0051957	0.0031243	0.000157572	0.000444642	0.000379147	0.000267809	0.00144265	0.000481386	0.000159949	0.000182849	0.000594177	0.000185128
f__	0.00277104	0.00267797	4.50207e-05	0.000148214	0	0	0.000721327	0	0.000159949	0.000182849	0.000396118	0.000185128
g__	0.00277104	0.00267797	4.50207e-05	0.000148214	0	0	0.000721327	0	0.000159949	0.000182849	0.000396118	0.000185128
f__Bacteroidaceae	0.00034638	0	4.50207e-05	0	0	0	0	0.000160462	0	0	0	0
g__5-7N15	0	0	0	0	0	0	0	0.000160462	0	0	0	0
g__Bacteroides	0.00034638	0	4.50207e-05	0	0	0	0	0	0	0	0	0
f__p-2534-18B5	0.00034638	0	0	0	0	0	0	0	0	0	0	0
g__	0.00034638	0	0	0	0	0	0	0	0	0	0	0
f__Porphyromonadaceae	0.00034638	0.000223164	2.25104e-05	0	0.000189573	0	0	0	0	0	0	0
g__Dysgonomonas	0	0	2.25104e-05	0	0	0	0	0	0	0	0	0
g__Paludibacter	0.00034638	0.000223164	0	0	0.000189573	0	0	0	0	0	0	0
f__Prevotellaceae	0	0	4.50207e-05	0	0	0.000267809	0	0	0	0	0	0
g__Prevotella	0	0	4.50207e-05	0	0	0.000267809	0	0	0	0	0	0
f__Rikenellaceae	0	0	0	0	0.000189573	0	0	0	0	0	0	0
g__	0	0	0	0	0.000189573	0	0	0	0	0	0	0
f__SB-1	0.00034638	0.000223164	0	0.000148214	0	0	0	0.000320924	0	0	0	0
g__	0.00034638	0.000223164	0	0.000148214	0	0	0	0.000320924	0	0	0	0
Other	0.00103914	0	0	0.000148214	0	0	0.000721327	0	0	0	0.000198059	0
Other	0.00103914	0	0	0.000148214	0	0	0.000721327	0	0	0	0.000198059	0
c__Cytophagia	0	0.000223164	0.000225104	0.00118571	0.00151659	0.00187467	0.000480885	0.000320924	0.000159949	0	0.000396118	0.000555384
o__Cytophagales	0	0.000223164	0.000225104	0.00118571	0.00151659	0.00187467	0.000480885	0.000320924	0.000159949	0	0.000396118	0.000555384
f__Cytophagaceae	0	0.000223164	0.000157572	0.0010375	0.00151659	0.00187467	0.000240442	0.000320924	0.000159949	0	0.000396118	0.000555384
g__	0	0	4.50207e-05	0.000148214	0.000379147	0	0	0	0	0	0	6.17093e-05
g__Cytophaga	0	0	0	0.000148214	0.000379147	0.000267809	0	0	0	0	0.000198059	0.000123419
g__Sporocytophaga	0	0.000223164	2.25104e-05	0	0.000189573	0.000803428	0	0	0	0	0.000198059	0
Other	0	0	9.00414e-05	0.00074107	0.00056872	0.000803428	0.000240442	0.000320924	0.000159949	0	0	0.000370256
Other	0	0	6.75311e-05	0.000148214	0	0	0.000240442	0	0	0	0	0
Other	0	0	6.75311e-05	0.000148214	0	0	0.000240442	0	0	0	0	0
c__Flavobacteriia	0.00138552	0.000669493	2.25104e-05	0.000148214	0	0.000267809	0.00360664	0.00385109	0	0	0	6.17093e-05
o__Flavobacteriales	0.00138552	0.000669493	2.25104e-05	0.000148214	0	0.000267809	0.00360664	0.00385109	0	0	0	6.17093e-05
f__[Weeksellaceae]	0	0	0	0.000148214	0	0	0	0	0	0	0	0
Other	0	0	0	0.000148214	0	0	0	0	0	0	0	0
f__Cryomorphaceae	0	0	0	0	0	0	0	0.000160462	0	0	0	0
g__	0	0	0	0	0	0	0	0.000160462	0	0	0	0
f__Flavobacteriaceae	0.00138552	0.000669493	2.25104e-05	0	0	0.000267809	0.00360664	0.00369063	0	0	0	6.17093e-05
g__Flavobacterium	0.00138552	0.000669493	2.25104e-05	0	0	0.000267809	0.00360664	0.00369063	0	0	0	6.17093e-05
c__Sphingobacteriia	0.0017319	0.00178532	0.00209346	0.00429821	0.00473934	0.00401714	0.000240442	0	0.00351887	0.00475407	0.00475342	0.00388769
o__Sphingobacteriales	0.0017319	0.00178532	0.00209346	0.00429821	0.00473934	0.00401714	0.000240442	0	0.00351887	0.00475407	0.00475342	0.00388769
f__	0.000692761	0.000669493	4.50207e-05	0.000592856	0.00151659	0.00214247	0.000240442	0	0.000159949	0	0.000990295	0.000555384
g__	0.000692761	0.000669493	4.50207e-05	0.000592856	0.00151659	0.00214247	0.000240442	0	0.000159949	0	0.000990295	0.000555384
f__Sphingobacteriaceae	0.00103914	0.00111582	0.00204844	0.00370535	0.00322275	0.00187467	0	0	0.00335893	0.00475407	0.00376312	0.0033323
g__	0.00103914	0.00111582	0.00204844	0.00370535	0.00322275	0.00187467	0	0	0.00335893	0.00475407	0.00376312	0.0033323
Other	0	0	2.25104e-05	0.000148214	0	0	0	0	0	0	0	0
Other	0	0	2.25104e-05	0.000148214	0	0	0	0	0	0	0	0
Other	0	0	2.25104e-05	0.000148214	0	0	0	0	0	0	0	0
Other	0	0	2.25104e-05	0.000148214	0	0	0	0	0	0	0	0
p__BRC1	0.00034638	0	0	0	0	0	0	0	0	0	0	0
c__PRR-11	0.00034638	0	0	0	0	0	0	0	0	0	0	0
o__	0.00034638	0	0	0	0	0	0	0	0	0	0	0
f__	0.00034638	0	0	0	0	0	0	0	0	0	0	0
g__	0.00034638	0	0	0	0	0	0	0	0	0	0	0
p__Chlamydiae	0.00484932	0.00669493	0.00871151	0.0121535	0.0064455	0.011248	0.00336619	0.00401155	0.0116763	0.0159078	0.0114874	0.0132058
c__Chlamydiia	0.00484932	0.00669493	0.00871151	0.0121535	0.0064455	0.011248	0.00336619	0.00401155	0.0116763	0.0159078	0.0114874	0.0132058
o__	0	0	0	0	0	0	0	0	0	0	0	6.17093e-05
f__	0	0	0	0	0	0	0	0	0	0	0	6.17093e-05
g__	0	0	0	0	0	0	0	0	0	0	0	6.17093e-05
o__Chlamydiales	0.00484932	0.00669493	0.00866649	0.0120053	0.0064455	0.0109802	0.00312575	0.00385109	0.0116763	0.0159078	0.0112894	0.0131441
f__	0.00242466	0.00223164	0.00425446	0.0063732	0.00265403	0.00482057	0	0.00160462	0.00143954	0.00164564	0.00495148	0.00721999
g__	0.00242466	0.00223164	0.00425446	0.0063732	0.00265403	0.00482057	0	0.00160462	0.00143954	0.00164564	0.00495148	0.00721999
f__Parachlamydiaceae	0	0.000223164	0	0	0.000189573	0	0.000480885	0	0	0	0.000198059	6.17093e-05
g__Parachlamydia	0	0.000223164	0	0	0.000189573	0	0.000480885	0	0	0	0.000198059	6.17093e-05
f__Rhabdochlamydiaceae	0.0017319	0.00245481	0.00339906	0.00429821	0.00246445	0.00428495	0.00216398	0.0012837	0.00975688	0.0126166	0.00396118	0.00388769
g__Candidatus Rhabdochlamydia	0.0017319	0.00245481	0.00339906	0.00429821	0.00246445	0.00428495	0.00216398	0.0012837	0.00975688	0.0126166	0.00396118	0.00388769
Other	0.000692761	0.00178532	0.00101297	0.00133393	0.00113744	0.00187467	0.000480885	0.000962773	0.000479846	0.00164564	0.00217865	0.0019747
Other	0.000692761	0.00178532	0.00101297	0.00133393	0.00113744	0.00187467	0.000480885	0.000962773	0.000479846	0.00164564	0.00217865	0.0019747
Other	0	0	4.50207e-05	0.000148214	0	0.000267809	0.000240442	0.000160462	0	0	0.000198059	0
Other	0	0	4.50207e-05	0.000148214	0	0.000267809	0.000240442	0.000160462	0	0	0.000198059	0
Other	0	0	4.50207e-05	0.000148214	0	0.000267809	0.000240442	0.000160462	0	0	0.000198059	0
p__Chlorobi	0.000692761	0.000669493	2.25104e-05	0	0.000189573	0	0.000480885	0.000160462	0	0	0.000198059	0
c__	0	0	2.25104e-05	0	0	0	0	0	0	0	0	0
o__	0	0	2.25104e-05	0	0	0	0	0	0	0	0	0
f__	0	0	2.25104e-05	0	0	0	0	0	0	0	0	0
g__	0	0	2.25104e-05	0	0	0	0	0	0	0	0	0
c__BSV26	0.000692761	0.000223164	0	0	0	0	0.000480885	0	0	0	0	0
o__C20	0.00034638	0.000223164	0	0	0	0	0.000480885	0	0	0	0	0
f__	0.00034638	0.000223164	0	0	0	0	0.000480885	0	0	0	0	0
g__	0.00034638	0.000223164	0	0	0	0	0.000480885	0	0	0	0	0
o__VC38	0.00034638	0	0	0	0	0	0	0	0	0	0	0
f__	0.00034638	0	0	0	0	0	0	0	0	0	0	0
g__	0.00034638	0	0	0	0	0	0	0	0	0	0	0
c__OPB56	0	0.000223164	0	0	0.000189573	0	0	0.000160462	0	0	0	0
o__	0	0.000223164	0	0	0.000189573	0	0	0.000160462	0	0	0	0
f__	0	0.000223164	0	0	0.000189573	0	0	0.000160462	0	0	0	0
g__	0	0.000223164	0	0	0.000189573	0	0	0.000160462	0	0	0	0
c__SJA-28	0	0.000223164	0	0	0	0	0	0	0	0	0	0
o__	0	0.000223164	0	0	0	0	0	0	0	0	0	0
f__	0	0.000223164	0	0	0	0	0	0	0	0	0	0
g__	0	0.000223164	0	0	0	0	0	0	0	0	0	0
Other	0	0	0	0	0	0	0	0	0	0	0.000198059	0
Other	0	0	0	0	0	0	0	0	0	0	0.000198059	0
Other	0	0	0	0	0	0	0	0	0	0	0.000198059	0
Other	0	0	0	0	0	0	0	0	0	0	0.000198059	0
p__Chloroflexi	0.000692761	0.000892658	0.00353413	0.000592856	0.000189573	0	0.000240442	0.000320924	0.00303903	0.000914244	0.00713012	0.00234496
c__Anaerolineae	0.00034638	0.000446329	0	0	0	0	0	0	0	0	0	0
o__A31	0.00034638	0.000223164	0	0	0	0	0	0	0	0	0	0
f__	0.00034638	0	0	0	0	0	0	0	0	0	0	0
g__	0.00034638	0	0	0	0	0	0	0	0	0	0	0
f__S47	0	0.000223164	0	0	0	0	0	0	0	0	0	0
g__	0	0.000223164	0	0	0	0	0	0	0	0	0	0
o__SJA-15	0	0.000223164	0	0	0	0	0	0	0	0	0	0
f__	0	0.000223164	0	0	0	0	0	0	0	0	0	0
g__	0	0.000223164	0	0	0	0	0	0	0	0	0	0
c__Ktedonobacteria	0.00034638	0.000223164	0.00247614	0.000592856	0.000189573	0	0.000240442	0.000320924	0.00255918	0.000365698	0.00594177	0.00166615
o__B12-WMSP1	0	0	0.000112552	0	0	0	0	0	0.000159949	0	0.000396118	6.17093e-05
f__	0	0	0.000112552	0	0	0	0	0	0.000159949	0	0.000396118	6.17093e-05
g__	0	0	0.000112552	0	0	0	0	0	0.000159949	0	0.000396118	6.17093e-05
o__JG30-KF-AS9	0	0	2.25104e-05	0	0	0	0	0	0.000159949	0	0.000198059	0
f__	0	0	2.25104e-05	0	0	0	0	0	0.000159949	0	0.000198059	0
g__	0	0	2.25104e-05	0	0	0	0	0	0.000159949	0	0.000198059	0
o__Ktedonobacterales	0	0	0.000112552	0.000296428	0	0	0.000240442	0	0	0	0.000198059	0.000123419
f__Ktedonobacteraceae	0	0	0.000112552	0.000296428	0	0	0.000240442	0	0	0	0.000198059	0.000123419
g__	0	0	0.000112552	0.000296428	0	0	0.000240442	0	0	0	0	6.17093e-05
g__FFCH10602	0	0	0	0	0	0	0	0	0	0	0.000198059	6.17093e-05
o__Thermogemmatisporales	0.00034638	0	0.00164326	0	0.000189573	0	0	0.000160462	0.00143954	0	0.00396118	0.000740512
f__Thermogemmatisporaceae	0.00034638	0	0.00148568	0	0	0	0	0.000160462	0.00143954	0	0.003367	0.000678803
g__	0.00034638	0	0.00148568	0	0	0	0	0.000160462	0.00143954	0	0.003367	0.000678803
Other	0	0	0.000157572	0	0.000189573	0	0	0	0	0	0.000594177	6.17093e-05
Other	0	0	0.000157572	0	0.000189573	0	0	0	0	0	0.000594177	6.17093e-05
Other	0	0.000223164	0.000585269	0.000296428	0	0	0	0.000160462	0.000799744	0.000365698	0.00118835	0.000740512
Other	0	0.000223164	0.000585269	0.000296428	0	0	0	0.000160462	0.000799744	0.000365698	0.00118835	0.000740512
Other	0	0.000223164	0.000585269	0.000296428	0	0	0	0.000160462	0.000799744	0.000365698	0.00118835	0.000740512
c__SAR202	0	0	0	0	0	0	0	0	0	0	0	0.000123419
o__	0	0	0	0	0	0	0	0	0	0	0	0.000123419
f__	0	0	0	0	0	0	0	0	0	0	0	0.000123419
g__	0	0	0	0	0	0	0	0	0	0	0	0.000123419
c__TK10	0	0.000223164	0.000990456	0	0	0	0	0	0.000479846	0.000548546	0.000792236	0.000493675
o__B07_WMSP1	0	0.000223164	0.000990456	0	0	0	0	0	0.000479846	0.000548546	0.000792236	0.000493675
f__	0	0.000223164	0.000922925	0	0	0	0	0	0.000479846	0	0.000792236	0.000493675
g__	0	0.000223164	0.000922925	0	0	0	0	0	0.000479846	0	0.000792236	0.000493675
Other	0	0	6.75311e-05	0	0	0	0	0	0	0.000548546	0	0
Other	0	0	6.75311e-05	0	0	0	0	0	0	0.000548546	0	0
c__TK17	0	0	2.25104e-05	0	0	0	0	0	0	0	0	0
o__	0	0	2.25104e-05	0	0	0	0	0	0	0	0	0
f__	0	0	2.25104e-05	0	0	0	0	0	0	0	0	0
g__	0	0	2.25104e-05	0	0	0	0	0	0	0	0	0
Other	0	0	4.50207e-05	0	0	0	0	0	0	0	0.000396118	6.17093e-05
Other	0	0	4.50207e-05	0	0	0	0	0	0	0	0.000396118	6.17093e-05
Other	0	0	4.50207e-05	0	0	0	0	0	0	0	0.000396118	6.17093e-05
Other	0	0	4.50207e-05	0	0	0	0	0	0	0	0.000396118	6.17093e-05
p__Cyanobacteria	0.000692761	0.000223164	0.0156447	0.0084482	0.000189573	0.000803428	0.000721327	0.000962773	0.00431862	0.00438837	0.000198059	0.000370256
c__Chloroplast	0.000692761	0.000223164	0.0156447	0.0084482	0	0	0.000721327	0.000962773	0.00431862	0.00438837	0.000198059	0.000246837
o__Chlorophyta	0	0	0	0.000148214	0	0	0	0	0	0.000548546	0	0
f__	0	0	0	0.000148214	0	0	0	0	0	0.000548546	0	0
g__	0	0	0	0.000148214	0	0	0	0	0	0.000548546	0	0
o__Stramenopiles	0.000692761	0	0.0125158	0.00755892	0	0	0.000721327	0.000802311	0.00399872	0.00383982	0.000198059	0.000185128
f__	0.000692761	0	0.0125158	0.00755892	0	0	0.000721327	0.000802311	0.00399872	0.00383982	0.000198059	0.000185128
g__	0.000692761	0	0.0125158	0.00755892	0	0	0.000721327	0.000802311	0.00399872	0.00383982	0.000198059	0.000185128
o__Streptophyta	0	0	0.000180083	0	0	0	0	0	0	0	0	0
f__	0	0	0.000180083	0	0	0	0	0	0	0	0	0
g__	0	0	0.000180083	0	0	0	0	0	0	0	0	0
Other	0	0.000223164	0.00294886	0.00074107	0	0	0	0.000160462	0.000319898	0	0	6.17093e-05
Other	0	0.000223164	0.00294886	0.00074107	0	0	0	0.000160462	0.000319898	0	0	6.17093e-05
Other	0	0.000223164	0.00294886	0.00074107	0	0	0	0.000160462	0.000319898	0	0	6.17093e-05
Other	0	0	0	0	0.000189573	0.000803428	0	0	0	0	0	0.000123419
Other	0	0	0	0	0.000189573	0.000803428	0	0	0	0	0	0.000123419
Other	0	0	0	0	0.000189573	0.000803428	0	0	0	0	0	0.000123419
Other	0	0	0	0	0.000189573	0.000803428	0	0	0	0	0	0.000123419
p__Deferribacteres	0	0	6.75311e-05	0	0	0	0	0	0	0	0	0
c__Deferribacteres	0	0	6.75311e-05	0	0	0	0	0	0	0	0	0
o__Deferribacterales	0	0	6.75311e-05	0	0	0	0	0	0	0	0	0
f__Deferribacteraceae	0	0	6.75311e-05	0	0	0	0	0	0	0	0	0
g__Mucispirillum	0	0	6.75311e-05	0	0	0	0	0	0	0	0	0
p__Elusimicrobia	0.00727399	0.00267797	0.00139564	0.002075	0.0036019	0.00723085	0.00264487	0.00288832	0.000319898	0.000731395	0.00376312	0.00407282
c__	0.00034638	0	0	0	0	0	0	0.000160462	0	0	0	0
o__	0.00034638	0	0	0	0	0	0	0.000160462	0	0	0	0
f__	0.00034638	0	0	0	0	0	0	0.000160462	0	0	0	0
g__	0.00034638	0	0	0	0	0	0	0.000160462	0	0	0	0
c__Elusimicrobia	0.00484932	0.00223164	0.00132811	0.00192678	0.0036019	0.00696304	0.0016831	0.00224647	0.000319898	0.000731395	0.003367	0.00388769
o__Elusimicrobiales	0.00207828	0.00111582	0.000360166	0.000444642	0.000947867	0.00107124	0.000721327	0.000802311	0	0	0.000792236	0.00141932
f__	0.00207828	0.00111582	0.000360166	0.000444642	0.000947867	0.00107124	0.000721327	0.000802311	0	0	0.000792236	0.00141932
g__	0.00207828	0.00111582	0.000360166	0.000444642	0.000947867	0.00107124	0.000721327	0.000802311	0	0	0.000792236	0.00141932
o__FAC88	0.00277104	0.00111582	0.000945435	0.00118571	0.00265403	0.00589181	0.00096177	0.00144416	0.000319898	0.000548546	0.00237671	0.00234496
f__	0.00277104	0.00111582	0.000945435	0.00118571	0.00265403	0.00589181	0.00096177	0.00144416	0.000319898	0.000548546	0.00237671	0.00234496
g__	0.00277104	0.00111582	0.000945435	0.00118571	0.00265403	0.00589181	0.00096177	0.00144416	0.000319898	0.000548546	0.00237671	0.00234496
o__IIb	0	0	2.25104e-05	0.000296428	0	0	0	0	0	0.000182849	0.000198059	0.000123419
f__	0	0	2.25104e-05	0.000296428	0	0	0	0	0	0.000182849	0.000198059	0.000123419
g__	0	0	2.25104e-05	0.000296428	0	0	0	0	0	0.000182849	0.000198059	0.000123419
c__Endomicrobia	0.00103914	0.000446329	6.75311e-05	0	0	0	0.00096177	0.000481386	0	0	0.000198059	6.17093e-05
o__	0.00103914	0.000446329	6.75311e-05	0	0	0	0.00096177	0.000481386	0	0	0.000198059	6.17093e-05
f__	0.00103914	0.000446329	6.75311e-05	0	0	0	0.00096177	0.000481386	0	0	0.000198059	6.17093e-05
g__	0.00103914	0.000446329	6.75311e-05	0	0	0	0.00096177	0.000481386	0	0	0.000198059	6.17093e-05
Other	0.00103914	0	0	0.000148214	0	0.000267809	0	0	0	0	0.000198059	0.000123419
Other	0.00103914	0	0	0.000148214	0	0.000267809	0	0	0	0	0.000198059	0.000123419
Other	0.00103914	0	0	0.000148214	0	0.000267809	0	0	0	0	0.000198059	0.000123419
Other	0.00103914	0	0	0.000148214	0	0.000267809	0	0	0	0	0.000198059	0.000123419
p__FCPU426	0.00034638	0	0.000360166	0.000592856	0.000379147	0.00107124	0.000240442	0	0.000639795	0.000365698	0.00118835	0.00209812
c__	0.00034638	0	0.000360166	0.000592856	0.000379147	0.00107124	0.000240442	0	0.000639795	0.000365698	0.00118835	0.00209812
o__	0.00034638	0	0.000360166	0.000592856	0.000379147	0.00107124	0.000240442	0	0.000639795	0.000365698	0.00118835	0.00209812
f__	0.00034638	0	0.000360166	0.000592856	0.000379147	0.00107124	0.000240442	0	0.000639795	0.000365698	0.00118835	0.00209812
g__	0.00034638	0	0.000360166	0.000592856	0.000379147	0.00107124	0.000240442	0	0.000639795	0.000365698	0.00118835	0.00209812
p__Fibrobacteres	0.00034638	0.00111582	0.000112552	0.000148214	0	0	0.000480885	0	0	0	0.000198059	0
c__	0.00034638	0	0	0	0	0	0	0	0	0	0	0
o__	0.00034638	0	0	0	0	0	0	0	0	0	0	0
f__	0.00034638	0	0	0	0	0	0	0	0	0	0	0
g__	0.00034638	0	0	0	0	0	0	0	0	0	0	0
c__B5-096	0	0	0	0	0	0	0.000240442	0	0	0	0	0
o__	0	0	0	0	0	0	0.000240442	0	0	0	0	0
f__	0	0	0	0	0	0	0.000240442	0	0	0	0	0
g__	0	0	0	0	0	0	0.000240442	0	0	0	0	0
c__Fibrobacteria	0	0.000446329	9.00414e-05	0	0	0	0	0	0	0	0.000198059	0
o__258ds10	0	0.000446329	9.00414e-05	0	0	0	0	0	0	0	0.000198059	0
f__	0	0.000446329	9.00414e-05	0	0	0	0	0	0	0	0.000198059	0
g__	0	0.000446329	9.00414e-05	0	0	0	0	0	0	0	0.000198059	0
c__TG3	0	0.000669493	2.25104e-05	0.000148214	0	0	0.000240442	0	0	0	0	0
o__TG3-1	0	0.000669493	2.25104e-05	0.000148214	0	0	0.000240442	0	0	0	0	0
f__B122	0	0.000669493	2.25104e-05	0.000148214	0	0	0.000240442	0	0	0	0	0
g__	0	0.000669493	2.25104e-05	0.000148214	0	0	0.000240442	0	0	0	0	0
p__Firmicutes	0.00900589	0.00714126	0.00135062	0.000296428	0.000758294	0.00160686	0.00216398	0.00272786	0.000959693	0.000365698	0.000990295	0.00092564
c__Bacilli	0.00103914	0.000669493	0.000540249	0	0.000758294	0.00133905	0	0.000160462	0.000159949	0.000182849	0.000594177	0.000678803
o__Bacillales	0.000692761	0.000446329	0.000292635	0	0	0.000267809	0	0	0	0	0.000396118	0.000246837
f__Alicyclobacillaceae	0	0	6.75311e-05	0	0	0	0	0	0	0	0	6.17093e-05
g__	0	0	6.75311e-05	0	0	0	0	0	0	0	0	6.17093e-05
f__Bacillaceae	0	0	2.25104e-05	0	0	0	0	0	0	0	0.000198059	0
g__Anoxybacillus	0	0	2.25104e-05	0	0	0	0	0	0	0	0	0
Other	0	0	0	0	0	0	0	0	0	0	0.000198059	0
f__Paenibacillaceae	0	0	0.000112552	0	0	0	0	0	0	0	0.000198059	0.000123419
g__Cohnella	0	0	2.25104e-05	0	0	0	0	0	0	0	0	0
g__Paenibacillus	0	0	9.00414e-05	0	0	0	0	0	0	0	0	0.000123419
Other	0	0	0	0	0	0	0	0	0	0	0.000198059	0
f__Staphylococcaceae	0.000692761	0.000446329	9.00414e-05	0	0	0.000267809	0	0	0	0	0	6.17093e-05
g__Salinicoccus	0.000692761	0.000446329	9.00414e-05	0	0	0.000267809	0	0	0	0	0	6.17093e-05
o__Lactobacillales	0.00034638	0.000223164	2.25104e-05	0	0	0	0	0	0	0	0	0
f__Leuconostocaceae	0	0	2.25104e-05	0	0	0	0	0	0	0	0	0
g__Leuconostoc	0	0	2.25104e-05	0	0	0	0	0	0	0	0	0
f__Streptococcaceae	0.00034638	0.000223164	0	0	0	0	0	0	0	0	0	0
g__Lactococcus	0.00034638	0.000223164	0	0	0	0	0	0	0	0	0	0
Other	0	0	0.000225104	0	0.000758294	0.00107124	0	0.000160462	0.000159949	0.000182849	0.000198059	0.000431965
Other	0	0	0.000225104	0	0.000758294	0.00107124	0	0.000160462	0.000159949	0.000182849	0.000198059	0.000431965
Other	0	0	0.000225104	0	0.000758294	0.00107124	0	0.000160462	0.000159949	0.000182849	0.000198059	0.000431965
c__Clostridia	0.00796675	0.00624861	0.000742842	0.000296428	0	0.000267809	0.00216398	0.00256739	0.000639795	0.000182849	0.000396118	0.000246837
o__Clostridiales	0.00762037	0.00580228	0.0006528	0.000148214	0	0.000267809	0.00216398	0.00256739	0.000639795	0.000182849	0.000396118	0.000185128
f__	0	0	0	0	0	0	0	0	0	0	0.000198059	0
g__	0	0	0	0	0	0	0	0	0	0	0.000198059	0
f__[Mogibacteriaceae]	0.0017319	0.000446329	0	0	0	0	0.000240442	0	0	0	0	0
g__	0	0	0	0	0	0	0.000240442	0	0	0	0	0
Other	0.0017319	0.000446329	0	0	0	0	0	0	0	0	0	0
f__Christensenellaceae	0.00034638	0	0	0	0	0	0	0	0	0	0	0
g__	0.00034638	0	0	0	0	0	0	0	0	0	0	0
f__Clostridiaceae	0.00103914	0.00156215	2.25104e-05	0	0	0	0	0	0	0	0	6.17093e-05
g__Caloramator	0	0.000223164	0	0	0	0	0	0	0	0	0	0
g__Clostridium	0.00103914	0.000446329	0	0	0	0	0	0	0	0	0	6.17093e-05
Other	0	0.000892658	2.25104e-05	0	0	0	0	0	0	0	0	0
f__Lachnospiraceae	0.00034638	0.000446329	2.25104e-05	0	0	0	0	0.000320924	0	0	0	6.17093e-05
g__	0	0	0	0	0	0	0	0.000160462	0	0	0	0
g__Coprococcus	0	0.000223164	0	0	0	0	0	0	0	0	0	0
g__Dorea	0	0	0	0	0	0	0	0	0	0	0	6.17093e-05
Other	0.00034638	0.000223164	2.25104e-05	0	0	0	0	0.000160462	0	0	0	0
f__Peptococcaceae	0	0	2.25104e-05	0	0	0	0	0	0	0	0	0
g__Pelotomaculum	0	0	2.25104e-05	0	0	0	0	0	0	0	0	0
f__Ruminococcaceae	0.00034638	0.000446329	0.000225104	0	0	0.000267809	0	0	0	0	0.000198059	0
g__	0	0.000446329	0.000157572	0	0	0.000267809	0	0	0	0	0	0
g__Oscillospira	0	0	2.25104e-05	0	0	0	0	0	0	0	0	0
g__Ruminococcus	0.00034638	0	0	0	0	0	0	0	0	0	0	0
Other	0	0	4.50207e-05	0	0	0	0	0	0	0	0.000198059	0
f__Veillonellaceae	0.0017319	0.000669493	0.000180083	0.000148214	0	0	0.000480885	0.00144416	0.000639795	0.000182849	0	0
g__	0.00034638	0	0.000112552	0	0	0	0	0.000641849	0	0	0	0
g__Megasphaera	0	0	2.25104e-05	0	0	0	0	0	0	0	0	0
g__Veillonella	0	0	2.25104e-05	0	0	0	0	0	0	0	0	0
Other	0.00138552	0.000669493	2.25104e-05	0.000148214	0	0	0.000480885	0.000802311	0.000639795	0.000182849	0	0
Other	0.00207828	0.00223164	0.000180083	0	0	0	0.00144265	0.000802311	0	0	0	6.17093e-05
Other	0.00207828	0.00223164	0.000180083	0	0	0	0.00144265	0.000802311	0	0	0	6.17093e-05
o__OPB54	0.00034638	0	0	0	0	0	0	0	0	0	0	0
f__	0.00034638	0	0	0	0	0	0	0	0	0	0	0
g__	0.00034638	0	0	0	0	0	0	0	0	0	0	0
Other	0	0.000446329	9.00414e-05	0.000148214	0	0	0	0	0	0	0	6.17093e-05
Other	0	0.000446329	9.00414e-05	0.000148214	0	0	0	0	0	0	0	6.17093e-05
Other	0	0.000446329	9.00414e-05	0.000148214	0	0	0	0	0	0	0	6.17093e-05
Other	0	0.000223164	6.75311e-05	0	0	0	0	0	0.000159949	0	0	0
Other	0	0.000223164	6.75311e-05	0	0	0	0	0	0.000159949	0	0	0
Other	0	0.000223164	6.75311e-05	0	0	0	0	0	0.000159949	0	0	0
Other	0	0.000223164	6.75311e-05	0	0	0	0	0	0.000159949	0	0	0
p__Fusobacteria	0	0.000223164	6.75311e-05	0	0.000189573	0.000267809	0	0.000802311	0	0	0	0
c__Fusobacteriia	0	0.000223164	6.75311e-05	0	0.000189573	0.000267809	0	0.000802311	0	0	0	0
o__Fusobacteriales	0	0.000223164	6.75311e-05	0	0.000189573	0.000267809	0	0.000802311	0	0	0	0
f__	0	0	2.25104e-05	0	0	0	0	0.000481386	0	0	0	0
g__	0	0	2.25104e-05	0	0	0	0	0.000481386	0	0	0	0
f__Fusobacteriaceae	0	0.000223164	4.50207e-05	0	0.000189573	0.000267809	0	0.000320924	0	0	0	0
g__	0	0.000223164	0	0	0	0	0	0	0	0	0	0
g__Cetobacterium	0	0	2.25104e-05	0	0.000189573	0.000267809	0	0.000320924	0	0	0	0
g__u114	0	0	2.25104e-05	0	0	0	0	0	0	0	0	0
p__GAL15	0	0	0	0	0	0	0	0	0	0	0	0.000185128
c__	0	0	0	0	0	0	0	0	0	0	0	0.000185128
o__	0	0	0	0	0	0	0	0	0	0	0	0.000185128
f__	0	0	0	0	0	0	0	0	0	0	0	0.000185128
g__	0	0	0	0	0	0	0	0	0	0	0	0.000185128
p__Gemmatimonadetes	0.00034638	0	0.000180083	0	0.000189573	0	0.000240442	0.000160462	0.000159949	0	0	0.000185128
c__Gemm-1	0.00034638	0	0	0	0	0	0	0	0	0	0	6.17093e-05
o__	0.00034638	0	0	0	0	0	0	0	0	0	0	6.17093e-05
f__	0.00034638	0	0	0	0	0	0	0	0	0	0	6.17093e-05
g__	0.00034638	0	0	0	0	0	0	0	0	0	0	6.17093e-05
c__Gemmatimonadetes	0	0	0.000180083	0	0.000189573	0	0.000240442	0.000160462	0.000159949	0	0	0.000123419
o__	0	0	6.75311e-05	0	0.000189573	0	0	0.000160462	0	0	0	0.000123419
f__	0	0	6.75311e-05	0	0.000189573	0	0	0.000160462	0	0	0	0.000123419
g__	0	0	6.75311e-05	0	0.000189573	0	0	0.000160462	0	0	0	0.000123419
o__Ellin5290	0	0	4.50207e-05	0	0	0	0.000240442	0	0	0	0	0
f__	0	0	4.50207e-05	0	0	0	0.000240442	0	0	0	0	0
g__	0	0	4.50207e-05	0	0	0	0.000240442	0	0	0	0	0
o__Gemmatimonadales	0	0	6.75311e-05	0	0	0	0	0	0.000159949	0	0	0
f__Ellin5301	0	0	6.75311e-05	0	0	0	0	0	0.000159949	0	0	0
g__	0	0	6.75311e-05	0	0	0	0	0	0.000159949	0	0	0
p__GN02	0.000692761	0.000223164	2.25104e-05	0	0.000379147	0.000267809	0.000480885	0.000641849	0	0	0	0
c__3BR-5F	0	0.000223164	0	0	0.000379147	0.000267809	0	0.000320924	0	0	0	0
o__	0	0.000223164	0	0	0.000379147	0.000267809	0	0.000320924	0	0	0	0
f__	0	0.000223164	0	0	0.000379147	0.000267809	0	0.000320924	0	0	0	0
g__	0	0.000223164	0	0	0.000379147	0.000267809	0	0.000320924	0	0	0	0
c__BB34	0	0	0	0	0	0	0.000240442	0	0	0	0	0
o__	0	0	0	0	0	0	0.000240442	0	0	0	0	0
f__	0	0	0	0	0	0	0.000240442	0	0	0	0	0
g__	0	0	0	0	0	0	0.000240442	0	0	0	0	0
c__GKS2-174	0.000692761	0	2.25104e-05	0	0	0	0.000240442	0	0	0	0	0
o__	0.000692761	0	2.25104e-05	0	0	0	0.000240442	0	0	0	0	0
f__	0.000692761	0	2.25104e-05	0	0	0	0.000240442	0	0	0	0	0
g__	0.000692761	0	2.25104e-05	0	0	0	0.000240442	0	0	0	0	0
c__GN10	0	0	0	0	0	0	0	0.000320924	0	0	0	0
o__	0	0	0	0	0	0	0	0.000320924	0	0	0	0
f__	0	0	0	0	0	0	0	0.000320924	0	0	0	0
g__	0	0	0	0	0	0	0	0.000320924	0	0	0	0
p__GN04	0	0	0	0	0	0	0.000240442	0	0	0	0	0
c__GN15	0	0	0	0	0	0	0.000240442	0	0	0	0	0
o__	0	0	0	0	0	0	0.000240442	0	0	0	0	0
f__	0	0	0	0	0	0	0.000240442	0	0	0	0	0
g__	0	0	0	0	0	0	0.000240442	0	0	0	0	0
p__LCP-89	0	0.000223164	0	0	0	0	0	0	0	0	0	0
c__SAW1_B44	0	0.000223164	0	0	0	0	0	0	0	0	0	0
o__	0	0.000223164	0	0	0	0	0	0	0	0	0	0
f__	0	0.000223164	0	0	0	0	0	0	0	0	0	0
g__	0	0.000223164	0	0	0	0	0	0	0	0	0	0
p__LD1	0	0	0	0	0	0	0.000240442	0	0	0	0	0
c__	0	0	0	0	0	0	0.000240442	0	0	0	0	0
o__	0	0	0	0	0	0	0.000240442	0	0	0	0	0
f__	0	0	0	0	0	0	0.000240442	0	0	0	0	0
g__	0	0	0	0	0	0	0.000240442	0	0	0	0	0
p__Lentisphaerae	0.00034638	0.000892658	0	0	0	0	0	0.000320924	0	0	0	0
c__[Lentisphaeria]	0.00034638	0.000892658	0	0	0	0	0	0.000320924	0	0	0	0
o__Victivallales	0	0.000223164	0	0	0	0	0	0.000320924	0	0	0	0
f__Victivallaceae	0	0.000223164	0	0	0	0	0	0.000320924	0	0	0	0
g__	0	0.000223164	0	0	0	0	0	0.000320924	0	0	0	0
o__Z20	0	0.000669493	0	0	0	0	0	0	0	0	0	0
f__	0	0.000669493	0	0	0	0	0	0	0	0	0	0
g__	0	0.000669493	0	0	0	0	0	0	0	0	0	0
Other	0.00034638	0	0	0	0	0	0	0	0	0	0	0
Other	0.00034638	0	0	0	0	0	0	0	0	0	0	0
Other	0.00034638	0	0	0	0	0	0	0	0	0	0	0
p__MVP-21	0.00034638	0	0	0	0	0	0	0	0	0	0	0
c__	0.00034638	0	0	0	0	0	0	0	0	0	0	0
o__	0.00034638	0	0	0	0	0	0	0	0	0	0	0
f__	0.00034638	0	0	0	0	0	0	0	0	0	0	0
g__	0.00034638	0	0	0	0	0	0	0	0	0	0	0
p__NC10	0	0	2.25104e-05	0	0	0	0	0	0	0.000182849	0	0
c__12-24	0	0	2.25104e-05	0	0	0	0	0	0	0.000182849	0	0
o__	0	0	2.25104e-05	0	0	0	0	0	0	0	0	0
f__	0	0	2.25104e-05	0	0	0	0	0	0	0	0	0
g__	0	0	2.25104e-05	0	0	0	0	0	0	0	0	0
o__JH-WHS47	0	0	0	0	0	0	0	0	0	0.000182849	0	0
f__	0	0	0	0	0	0	0	0	0	0.000182849	0	0
g__	0	0	0	0	0	0	0	0	0	0.000182849	0	0
p__Nitrospirae	0.00138552	0.00156215	0.000472717	0.00074107	0.00056872	0.00107124	0	0.000962773	0	0.000365698	0.000198059	0.000863931
c__Nitrospira	0.00138552	0.00156215	0.000472717	0.00074107	0.00056872	0.00107124	0	0.000962773	0	0.000365698	0.000198059	0.000863931
o__Nitrospirales	0.00138552	0.00156215	0.000472717	0.00074107	0.00056872	0.00107124	0	0.000962773	0	0.000365698	0.000198059	0.000863931
f__	0	0	0	0	0	0	0	0.000160462	0	0	0	0
g__	0	0	0	0	0	0	0	0.000160462	0	0	0	0
f__[Leptospirillaceae]	0	0	0	0	0	0.000267809	0	0	0	0	0	6.17093e-05
g__	0	0	0	0	0	0.000267809	0	0	0	0	0	6.17093e-05
f__[Thermodesulfovibrionaceae]	0	0.00111582	0.000292635	0.000296428	0	0	0	0.000160462	0	0.000365698	0	0.000308547
g__	0	0.000223164	9.00414e-05	0.000148214	0	0	0	0	0	0	0	6.17093e-05
g__GOUTA19	0	0.000223164	0	0	0	0	0	0	0	0	0	0
Other	0	0.000669493	0.000202593	0.000148214	0	0	0	0.000160462	0	0.000365698	0	0.000246837
f__0319-6A21	0	0	0	0	0	0	0	0	0	0	0	6.17093e-05
g__	0	0	0	0	0	0	0	0	0	0	0	6.17093e-05
f__FW	0.00103914	0.000223164	6.75311e-05	0.000296428	0	0	0	0.000160462	0	0	0	0.000123419
g__4-29	0.00103914	0.000223164	6.75311e-05	0.000296428	0	0	0	0.000160462	0	0	0	0.000123419
f__Nitrospiraceae	0.00034638	0.000223164	0.000112552	0.000148214	0.00056872	0.000535619	0	0.000481386	0	0	0.000198059	0.000308547
g__JG37-AG-70	0.00034638	0.000223164	9.00414e-05	0.000148214	0	0.000267809	0	0.000160462	0	0	0	6.17093e-05
g__Nitrospira	0	0	2.25104e-05	0	0.000379147	0.000267809	0	0.000320924	0	0	0.000198059	0.000246837
Other	0	0	0	0	0.000189573	0	0	0	0	0	0	0
Other	0	0	0	0	0	0.000267809	0	0	0	0	0	0
Other	0	0	0	0	0	0.000267809	0	0	0	0	0	0
p__NKB19	0	0.000223164	0	0	0	0	0	0.000160462	0	0	0	0
c__	0	0.000223164	0	0	0	0	0	0.000160462	0	0	0	0
o__	0	0.000223164	0	0	0	0	0	0.000160462	0	0	0	0
f__	0	0.000223164	0	0	0	0	0	0.000160462	0	0	0	0
g__	0	0.000223164	0	0	0	0	0	0.000160462	0	0	0	0
p__OD1	0.00727399	0.00736443	0.000450207	0.000444642	0.00056872	0.00133905	0.00120221	0.00272786	0.000159949	0	0.000792236	0.00141932
c__	0.00450294	0.00468645	9.00414e-05	0	0	0	0.000721327	0.00112323	0	0	0	0
o__	0.00450294	0.00468645	9.00414e-05	0	0	0	0.000721327	0.00112323	0	0	0	0
f__	0.00450294	0.00468645	9.00414e-05	0	0	0	0.000721327	0.00112323	0	0	0	0
g__	0.00450294	0.00468645	9.00414e-05	0	0	0	0.000721327	0.00112323	0	0	0	0
c__ABY1	0.000692761	0.000223164	0	0	0	0	0	0.000160462	0	0	0	0
o__	0.000692761	0.000223164	0	0	0	0	0	0.000160462	0	0	0	0
f__	0.000692761	0.000223164	0	0	0	0	0	0.000160462	0	0	0	0
g__	0.000692761	0.000223164	0	0	0	0	0	0.000160462	0	0	0	0
c__ZB2	0.00207828	0.00245481	0.000360166	0.000444642	0.00056872	0.00133905	0.000240442	0.00144416	0.000159949	0	0.000792236	0.00141932
o__	0.00207828	0.00245481	0.000360166	0.000444642	0.00056872	0.00133905	0.000240442	0.00144416	0.000159949	0	0.000792236	0.00141932
f__	0.00207828	0.00245481	0.000360166	0.000444642	0.00056872	0.00133905	0.000240442	0.00144416	0.000159949	0	0.000792236	0.00141932
g__	0.00207828	0.00245481	0.000360166	0.000444642	0.00056872	0.00133905	0.000240442	0.00144416	0.000159949	0	0.000792236	0.00141932
Other	0	0	0	0	0	0	0.000240442	0	0	0	0	0
Other	0	0	0	0	0	0	0.000240442	0	0	0	0	0
Other	0	0	0	0	0	0	0.000240442	0	0	0	0	0
Other	0	0	0	0	0	0	0.000240442	0	0	0	0	0
p__OP3	0.00277104	0.00156215	4.50207e-05	0	0	0	0.00264487	0.0012837	0	0	0.000198059	6.17093e-05
c__	0	0	0	0	0	0	0	0.000160462	0	0	0	0
o__	0	0	0	0	0	0	0	0.000160462	0	0	0	0
f__	0	0	0	0	0	0	0	0.000160462	0	0	0	0
g__	0	0	0	0	0	0	0	0.000160462	0	0	0	0
c__BD4-9	0.00034638	0.00111582	4.50207e-05	0	0	0	0.0016831	0.000481386	0	0	0.000198059	6.17093e-05
o__	0.00034638	0.00111582	4.50207e-05	0	0	0	0.0016831	0.000481386	0	0	0.000198059	6.17093e-05
f__	0.00034638	0.00111582	4.50207e-05	0	0	0	0.0016831	0.000481386	0	0	0.000198059	6.17093e-05
g__	0.00034638	0.00111582	4.50207e-05	0	0	0	0.0016831	0.000481386	0	0	0.000198059	6.17093e-05
c__koll11	0.000692761	0.000223164	0	0	0	0	0.000721327	0.000481386	0	0	0	0
o__GIF10	0.000692761	0.000223164	0	0	0	0	0.000721327	0.000481386	0	0	0	0
f__	0.00034638	0.000223164	0	0	0	0	0.000721327	0.000481386	0	0	0	0
g__	0.00034638	0.000223164	0	0	0	0	0.000721327	0.000481386	0	0	0	0
f__kpj58rc	0.00034638	0	0	0	0	0	0	0	0	0	0	0
g__	0.00034638	0	0	0	0	0	0	0	0	0	0	0
c__PBS-25	0.0017319	0.000223164	0	0	0	0	0.000240442	0.000160462	0	0	0	0
o__	0.0017319	0.000223164	0	0	0	0	0.000240442	0.000160462	0	0	0	0
f__	0.0017319	0.000223164	0	0	0	0	0.000240442	0.000160462	0	0	0	0
g__	0.0017319	0.000223164	0	0	0	0	0.000240442	0.000160462	0	0	0	0
p__OP8	0	0	0	0	0	0	0	0	0	0.000182849	0	0
c__OP8_1	0	0	0	0	0	0	0	0	0	0.000182849	0	0
o__SHA-124	0	0	0	0	0	0	0	0	0	0.000182849	0	0
f__	0	0	0	0	0	0	0	0	0	0.000182849	0	0
g__	0	0	0	0	0	0	0	0	0	0.000182849	0	0
p__PAUC34f	0	0	0	0	0	0	0.000240442	0	0	0	0	0
c__	0	0	0	0	0	0	0.000240442	0	0	0	0	0
o__	0	0	0	0	0	0	0.000240442	0	0	0	0	0
f__	0	0	0	0	0	0	0.000240442	0	0	0	0	0
g__	0	0	0	0	0	0	0.000240442	0	0	0	0	0
p__Planctomycetes	0.00762037	0.00513278	0.0124257	0.00711427	0.00398104	0.00883771	0.00288531	0.00385109	0.0105566	0.0074968	0.0142602	0.00740512
c__BD7-11	0	0.000223164	0.000135062	0	0	0	0	0	0	0	0	6.17093e-05
o__	0	0.000223164	0.000135062	0	0	0	0	0	0	0	0	6.17093e-05
f__	0	0.000223164	0.000135062	0	0	0	0	0	0	0	0	6.17093e-05
g__	0	0.000223164	0.000135062	0	0	0	0	0	0	0	0	6.17093e-05
c__ODP123	0	0	0	0	0	0	0.000240442	0.000160462	0.000159949	0	0	0
o__T8-B82	0	0	0	0	0	0	0.000240442	0.000160462	0.000159949	0	0	0
f__	0	0	0	0	0	0	0.000240442	0.000160462	0.000159949	0	0	0
g__	0	0	0	0	0	0	0.000240442	0.000160462	0.000159949	0	0	0
c__Phycisphaerae	0.00242466	0.00133899	0.000742842	0.000296428	0.000189573	0.000267809	0.00096177	0.000481386	0.000319898	0.000365698	0.000396118	0.000493675
o__CPla-3	0.00034638	0	4.50207e-05	0	0	0	0.000240442	0.000160462	0	0	0	0
f__	0.00034638	0	4.50207e-05	0	0	0	0.000240442	0.000160462	0	0	0	0
g__	0.00034638	0	4.50207e-05	0	0	0	0.000240442	0.000160462	0	0	0	0
o__mle1-8	0	0	0	0	0	0	0	0.000160462	0	0	0	0
f__	0	0	0	0	0	0	0	0.000160462	0	0	0	0
g__	0	0	0	0	0	0	0	0.000160462	0	0	0	0
o__MSBL9	0.0017319	0.000446329	0	0	0	0	0.000240442	0	0	0	0	0
f__	0.0017319	0.000446329	0	0	0	0	0.000240442	0	0	0	0	0
g__	0.0017319	0.000446329	0	0	0	0	0.000240442	0	0	0	0	0
o__ODP1230B3009	0	0	0	0	0	0	0	0.000160462	0	0	0	0
f__	0	0	0	0	0	0	0	0.000160462	0	0	0	0
g__	0	0	0	0	0	0	0	0.000160462	0	0	0	0
o__Phycisphaerales	0	0.000223164	0	0	0	0	0	0	0.000159949	0	0	0
f__	0	0.000223164	0	0	0	0	0	0	0.000159949	0	0	0
g__	0	0.000223164	0	0	0	0	0	0	0.000159949	0	0	0
o__S-70	0	0	0	0	0.000189573	0	0	0	0	0	0	0
f__	0	0	0	0	0.000189573	0	0	0	0	0	0	0
g__	0	0	0	0	0.000189573	0	0	0	0	0	0	0
o__WD2101	0.00034638	0.000669493	0.000697821	0.000296428	0	0.000267809	0	0	0.000159949	0.000365698	0.000396118	0.000493675
f__	0.00034638	0.000669493	0.000697821	0.000296428	0	0.000267809	0	0	0.000159949	0.000365698	0.000396118	0.000493675
g__	0.00034638	0.000669493	0.000697821	0.000296428	0	0.000267809	0	0	0.000159949	0.000365698	0.000396118	0.000493675
Other	0	0	0	0	0	0	0.000480885	0	0	0	0	0
Other	0	0	0	0	0	0	0.000480885	0	0	0	0	0
Other	0	0	0	0	0	0	0.000480885	0	0	0	0	0
c__Pla4	0	0	0	0	0	0	0	0.000160462	0	0	0	0
o__	0	0	0	0	0	0	0	0.000160462	0	0	0	0
f__	0	0	0	0	0	0	0	0.000160462	0	0	0	0
g__	0	0	0	0	0	0	0	0.000160462	0	0	0	0
c__Planctomycetia	0.00484932	0.00111582	0.0115253	0.00681784	0.00322275	0.00696304	0.0016831	0.00224647	0.0100768	0.0071311	0.0138641	0.00647948
o__B97	0	0	0.000180083	0.000148214	0	0	0.000480885	0	0	0	0.000396118	0.000185128
f__	0	0	0.000180083	0.000148214	0	0	0.000480885	0	0	0	0.000396118	0.000185128
g__	0	0	0.000180083	0.000148214	0	0	0.000480885	0	0	0	0.000396118	0.000185128
o__Gemmatales	0.00311742	0.000892658	0.0106699	0.00592856	0.00265403	0.00482057	0.00096177	0.00192555	0.00943698	0.00676541	0.0118835	0.005307
f__Gemmataceae	0.00207828	0.000669493	0.0058752	0.00237142	0.00113744	0.00267809	0.000721327	0.00144416	0.00463852	0.00146279	0.00693207	0.00302376
g__	0.00138552	0.000223164	0.0049973	0.00133393	0.000947867	0.00214247	0.000480885	0.0012837	0.00399872	0.000731395	0.00613983	0.00259179
g__Gemmata	0.000692761	0.000446329	0.000675311	0.0010375	0.000189573	0.000535619	0.000240442	0.000160462	0.000479846	0.000731395	0.000396118	0.000431965
Other	0	0	0.000202593	0	0	0	0	0	0.000159949	0	0.000396118	0
f__Isosphaeraceae	0.00103914	0.000223164	0.0047722	0.00355714	0.00151659	0.00214247	0.000240442	0.000481386	0.00479846	0.00530261	0.00495148	0.00228325
g__	0.00103914	0.000223164	0.00461462	0.00355714	0.00151659	0.00214247	0.000240442	0.000481386	0.00447857	0.00530261	0.00495148	0.00215983
g__Singulisphaera	0	0	9.00414e-05	0	0	0	0	0	0.000159949	0	0	0.000123419
Other	0	0	6.75311e-05	0	0	0	0	0	0.000159949	0	0	0
Other	0	0	2.25104e-05	0	0	0	0	0	0	0	0	0
Other	0	0	2.25104e-05	0	0	0	0	0	0	0	0	0
o__Pirellulales	0.00103914	0	0.000315145	0.000296428	0.000379147	0.000267809	0.000240442	0.000160462	0.000159949	0.000365698	0.000990295	0.000493675
f__Pirellulaceae	0.00103914	0	0.000315145	0.000296428	0.000379147	0.000267809	0.000240442	0.000160462	0.000159949	0.000365698	0.000990295	0.000493675
g__	0.000692761	0	0.000270124	0.000296428	0.000379147	0.000267809	0.000240442	0.000160462	0.000159949	0.000365698	0.000396118	0.000493675
g__A17	0.00034638	0	4.50207e-05	0	0	0	0	0	0	0	0.000594177	0
o__Planctomycetales	0.000692761	0.000223164	0.000360166	0.000444642	0.000189573	0.00187467	0	0.000160462	0.000479846	0	0.000594177	0.000431965
f__Planctomycetaceae	0.000692761	0.000223164	0.000360166	0.000444642	0.000189573	0.00187467	0	0.000160462	0.000479846	0	0.000594177	0.000431965
g__Planctomyces	0.000692761	0.000223164	0.000360166	0.000444642	0.000189573	0.00187467	0	0.000160462	0.000479846	0	0.000594177	0.000431965
Other	0	0	0	0	0	0	0	0	0	0	0	6.17093e-05
Other	0	0	0	0	0	0	0	0	0	0	0	6.17093e-05
Other	0	0	0	0	0	0	0	0	0	0	0	6.17093e-05
c__SBZP_4958	0	0	0	0	0	0	0	0.000160462	0	0	0	0
o__	0	0	0	0	0	0	0	0.000160462	0	0	0	0
f__	0	0	0	0	0	0	0	0.000160462	0	0	0	0
g__	0	0	0	0	0	0	0	0.000160462	0	0	0	0
c__vadinHA49	0.00034638	0.00245481	2.25104e-05	0	0.00056872	0.00160686	0	0.000641849	0	0	0	0.000370256
o__DH61	0.00034638	0.00223164	0	0	0.00056872	0.00133905	0	0.000641849	0	0	0	0.000308547
f__	0.00034638	0.00223164	0	0	0.00056872	0.00133905	0	0.000641849	0	0	0	0.000308547
g__	0.00034638	0.00223164	0	0	0.00056872	0.00133905	0	0.000641849	0	0	0	0.000308547
o__p04_C01	0	0.000223164	2.25104e-05	0	0	0.000267809	0	0	0	0	0	0
f__	0	0.000223164	2.25104e-05	0	0	0.000267809	0	0	0	0	0	0
g__	0	0.000223164	2.25104e-05	0	0	0.000267809	0	0	0	0	0	0
o__PeHg47	0	0	0	0	0	0	0	0	0	0	0	6.17093e-05
f__	0	0	0	0	0	0	0	0	0	0	0	6.17093e-05
g__	0	0	0	0	0	0	0	0	0	0	0	6.17093e-05
p__Proteobacteria	0.832006	0.866771	0.730484	0.766859	0.920379	0.861007	0.889637	0.884788	0.756718	0.792101	0.770648	0.868189
c__Alphaproteobacteria	0.0162799	0.0107119	0.0491851	0.0508374	0.0327962	0.0623996	0.022842	0.0250321	0.0710173	0.0762479	0.0497128	0.0435051
o__	0.00103914	0.000446329	0.00110301	0.00133393	0.00208531	0.00428495	0.00096177	0.000641849	0.000639795	0.00201134	0.00178253	0.00253008
f__	0.00103914	0.000446329	0.00110301	0.00133393	0.00208531	0.00428495	0.00096177	0.000641849	0.000639795	0.00201134	0.00178253	0.00253008
g__	0.00103914	0.000446329	0.00110301	0.00133393	0.00208531	0.00428495	0.00096177	0.000641849	0.000639795	0.00201134	0.00178253	0.00253008
o__BD7-3	0	0.000223164	6.75311e-05	0	0	0.000267809	0.000721327	0.000641849	0	0	0	0.000123419
f__	0	0.000223164	6.75311e-05	0	0	0.000267809	0.000721327	0.000641849	0	0	0	0.000123419
g__	0	0.000223164	6.75311e-05	0	0	0.000267809	0.000721327	0.000641849	0	0	0	0.000123419
o__Caulobacterales	0.00034638	0.000446329	0.00139564	0.00148214	0.00208531	0.00187467	0.00096177	0.000160462	0.00127959	0.00274273	0.00118835	0.000863931
f__Caulobacteraceae	0.00034638	0.000446329	0.00139564	0.00148214	0.00208531	0.00187467	0.00096177	0.000160462	0.00127959	0.00274273	0.00118835	0.000802222
g__	0	0	0.000517738	0.000296428	0.000189573	0.000535619	0.000721327	0.000160462	0.000639795	0.00164564	0.000198059	0.000308547
g__Asticcacaulis	0	0.000223164	0.000405186	0.000296428	0.000379147	0	0.000240442	0	0	0	0	0.000123419
Other	0.00034638	0.000223164	0.000472717	0.000889284	0.00151659	0.00133905	0	0	0.000639795	0.00109709	0.000990295	0.000370256
Other	0	0	0	0	0	0	0	0	0	0	0	6.17093e-05
Other	0	0	0	0	0	0	0	0	0	0	0	6.17093e-05
o__Ellin329	0.00034638	0.000223164	0.000450207	0.00074107	0.000758294	0.000535619	0	0	0	0.000182849	0.00138641	0.00135761
f__	0.00034638	0.000223164	0.000450207	0.00074107	0.000758294	0.000535619	0	0	0	0.000182849	0.00138641	0.00135761
g__	0.00034638	0.000223164	0.000450207	0.00074107	0.000758294	0.000535619	0	0	0	0.000182849	0.00138641	0.00135761
o__Rhizobiales	0.0034638	0.00200848	0.0180533	0.0137839	0.00947867	0.0214247	0.00144265	0.00369063	0.0123161	0.00804535	0.0158447	0.0116014
f__	0	0	0	0	0	0.00107124	0	0	0	0	0	6.17093e-05
g__	0	0	0	0	0	0.00107124	0	0	0	0	0	6.17093e-05
f__Bradyrhizobiaceae	0	0.000446329	0.00312894	0.00074107	0	0.000535619	0	0.000160462	0.00207933	0.000548546	0.00237671	0.00123419
g__Bradyrhizobium	0	0.000446329	0.00306141	0.00074107	0	0.000535619	0	0.000160462	0.00207933	0.000548546	0.00237671	0.00123419
Other	0	0	6.75311e-05	0	0	0	0	0	0	0	0	0
f__Hyphomicrobiaceae	0.00207828	0.00111582	0.00904916	0.00251964	0.00189573	0.00428495	0.00096177	0.00176508	0.00495841	0.00237703	0.00970489	0.00438136
g__	0	0.000223164	0.000135062	0	0	0	0	0	0.000319898	0.000365698	0	0
g__Hyphomicrobium	0	0.000446329	6.75311e-05	0	0.000758294	0.000267809	0.000240442	0	0	0	0.000594177	0.000431965
g__Pedomicrobium	0.00034638	0	0.000202593	0	0	0.000267809	0	0	0	0	0	0
g__Rhodoplanes	0.0017319	0.000446329	0.00864398	0.00251964	0.00113744	0.00374933	0.000721327	0.00176508	0.00463852	0.00201134	0.00911071	0.0039494
f__Methylobacteriaceae	0	0	0	0	0	0	0	0.000320924	0.000319898	0	0	0
g__Methylobacterium	0	0	0	0	0	0	0	0.000320924	0.000319898	0	0	0
f__Methylocystaceae	0.00034638	0.000223164	0.00177832	0.00370535	0.00151659	0.00241028	0.000240442	0.000481386	0.00271913	0.00237703	0.000792236	0.00141932
g__	0.00034638	0.000223164	0.00144066	0.00340892	0.00113744	0.00160686	0.000240442	0.000160462	0.00271913	0.00237703	0.000594177	0.000802222
Other	0	0	0.000337655	0.000296428	0.000379147	0.000803428	0	0.000320924	0	0	0.000198059	0.000617093
f__Phyllobacteriaceae	0	0	0	0	0	0	0	0	0	0	0	0.000123419
Other	0	0	0	0	0	0	0	0	0	0	0	0.000123419
Other	0.00103914	0.000223164	0.00409688	0.00681784	0.00606635	0.0131227	0.000240442	0.000962773	0.00223928	0.00274273	0.00297089	0.00438136
Other	0.00103914	0.000223164	0.00409688	0.00681784	0.00606635	0.0131227	0.000240442	0.000962773	0.00223928	0.00274273	0.00297089	0.00438136
o__Rhodobacterales	0	0.000223164	0.000247614	0.0010375	0	0.000535619	0	0.000160462	0	0	0	0
f__Rhodobacteraceae	0	0.000223164	0.000247614	0.0010375	0	0.000535619	0	0.000160462	0	0	0	0
Other	0	0.000223164	0.000247614	0.0010375	0	0.000535619	0	0.000160462	0	0	0	0
o__Rhodospirillales	0.00415656	0.00245481	0.0113452	0.0108196	0.00606635	0.0174076	0.00240442	0.00224647	0.0134357	0.013348	0.0156467	0.0115396
f__Acetobacteraceae	0.00207828	0.000446329	0.00551504	0.00622499	0.00492891	0.0123192	0.000721327	0.000802311	0.00943698	0.0109709	0.00732818	0.005307
g__	0.00138552	0.000223164	0.00333153	0.00326071	0.0036019	0.00589181	0	0.000320924	0.00799744	0.00804535	0.00554565	0.00302376
g__Acidocella	0	0	0.000157572	0.000148214	0	0.000535619	0	0	0.000159949	0.000731395	0	0.000123419
Other	0.000692761	0.000223164	0.00202593	0.00281607	0.00132701	0.00589181	0.000721327	0.000481386	0.00127959	0.00219419	0.00178253	0.00215983
f__Rhodospirillaceae	0.00207828	0.00200848	0.00580767	0.00459463	0.00113744	0.00508838	0.0016831	0.00144416	0.00399872	0.00237703	0.00812042	0.00623264
g__	0	0.000669493	0.00486224	0.00266785	0.00113744	0.00482057	0.00096177	0.00112323	0.00255918	0.00182849	0.00554565	0.00518359
g__Azospirillum	0.00034638	0.000223164	0	0	0	0	0	0	0	0	0	0
g__Telmatospirillum	0.00103914	0.00111582	0.000900414	0.00177857	0	0.000267809	0.000721327	0.000320924	0.00127959	0.000548546	0.00198059	0.00098735
Other	0.000692761	0	4.50207e-05	0.000148214	0	0	0	0	0.000159949	0	0.000594177	6.17093e-05
Other	0	0	2.25104e-05	0	0	0	0	0	0	0	0.000198059	0
Other	0	0	2.25104e-05	0	0	0	0	0	0	0	0.000198059	0
o__Rickettsiales	0.00207828	0.00133899	0.00139564	0.00074107	0.000189573	0.00187467	0.00120221	0.00112323	0.00111964	0.000731395	0.000198059	0.00098735
f__	0.00138552	0.000669493	0.00063029	0.000592856	0.000189573	0.00187467	0.00096177	0.000802311	0.000799744	0.000365698	0	0.000617093
g__	0.00138552	0.000669493	0.00063029	0.000592856	0.000189573	0.00187467	0.00096177	0.000802311	0.000799744	0.000365698	0	0.000617093
f__Holosporaceae	0	0.000223164	2.25104e-05	0	0	0	0	0	0	0.000365698	0	6.17093e-05
g__	0	0.000223164	2.25104e-05	0	0	0	0	0	0	0.000365698	0	6.17093e-05
f__mitochondria	0	0	0.000292635	0	0	0	0	0	0.000159949	0	0	6.17093e-05
g__	0	0	0.000292635	0	0	0	0	0	0.000159949	0	0	6.17093e-05
f__Rickettsiaceae	0	0.000223164	0.000202593	0	0	0	0	0.000320924	0	0	0.000198059	0.000123419
g__	0	0	2.25104e-05	0	0	0	0	0	0	0	0.000198059	0
g__Rickettsia	0	0	4.50207e-05	0	0	0	0	0	0	0	0	0
Other	0	0.000223164	0.000135062	0	0	0	0	0.000320924	0	0	0	0.000123419
Other	0.000692761	0.000223164	0.000247614	0.000148214	0	0	0.000240442	0	0.000159949	0	0	0.000123419
Other	0.000692761	0.000223164	0.000247614	0.000148214	0	0	0.000240442	0	0.000159949	0	0	0.000123419
o__Sphingomonadales	0.00381018	0.00245481	0.0132136	0.0200089	0.0113744	0.0120514	0.0144265	0.014923	0.0415867	0.0488206	0.0106952	0.0115396
f__Erythrobacteraceae	0	0	4.50207e-05	0	0.000189573	0.000267809	0	0	0.000159949	0	0	0
g__Erythrobacter	0	0	4.50207e-05	0	0.000189573	0.000267809	0	0	0.000159949	0	0	0
f__Sphingomonadaceae	0.00381018	0.00245481	0.0131686	0.0200089	0.0111848	0.0117836	0.0144265	0.014923	0.0414267	0.0488206	0.0106952	0.0115396
g__	0.00103914	0	0.0104448	0.0161553	0.00966825	0.00723085	0.0016831	0.00112323	0.0401472	0.0455293	0.00891266	0.00894786
g__Kaistobacter	0	0	6.75311e-05	0	0	0	0	0	0	0	0	0
g__Novosphingobium	0.00242466	0.00200848	0.000427697	0.00074107	0.000758294	0.00267809	0.012503	0.0131579	0.000319898	0.00146279	0.000198059	0.00117248
g__Sphingomonas	0	0	2.25104e-05	0	0	0	0	0.000320924	0	0.000182849	0.000198059	6.17093e-05
Other	0.00034638	0.000446329	0.00220601	0.00311249	0.000758294	0.00187467	0.000240442	0.000320924	0.000959693	0.00164564	0.00138641	0.00135761
Other	0.00103914	0.000892658	0.00191338	0.000889284	0.000758294	0.00214247	0.000721327	0.00144416	0.000639795	0.000365698	0.00297089	0.00296205
Other	0.00103914	0.000892658	0.00191338	0.000889284	0.000758294	0.00214247	0.000721327	0.00144416	0.000639795	0.000365698	0.00297089	0.00296205
Other	0.00103914	0.000892658	0.00191338	0.000889284	0.000758294	0.00214247	0.000721327	0.00144416	0.000639795	0.000365698	0.00297089	0.00296205
c__Betaproteobacteria	0.772082	0.818567	0.652913	0.682229	0.851754	0.746652	0.851887	0.84371	0.653231	0.687146	0.676768	0.786115
o__	0.000692761	0	4.50207e-05	0.000148214	0	0.000267809	0	0.000320924	0	0	0	6.17093e-05
f__	0.000692761	0	4.50207e-05	0.000148214	0	0.000267809	0	0.000320924	0	0	0	6.17093e-05
g__	0.000692761	0	4.50207e-05	0.000148214	0	0.000267809	0	0.000320924	0	0	0	6.17093e-05
o__A21b	0	0	4.50207e-05	0	0	0	0	0	0.000159949	0	0	0
f__EB1003	0	0	4.50207e-05	0	0	0	0	0	0.000159949	0	0	0
g__	0	0	4.50207e-05	0	0	0	0	0	0.000159949	0	0	0
o__Burkholderiales	0.695878	0.729301	0.607284	0.620276	0.810995	0.695501	0.825679	0.818999	0.623321	0.653136	0.636958	0.734526
f__	0.00034638	0.000892658	0.000112552	0.000148214	0	0.000267809	0.000240442	0.000320924	0	0	0	0.000246837
g__	0.00034638	0.000892658	0.000112552	0.000148214	0	0.000267809	0.000240442	0.000320924	0	0	0	0.000246837
f__Alcaligenaceae	0.00138552	0.00245481	0.00204844	0.00222321	0.00189573	0.00187467	0.00480885	0.0033697	0.00191939	0.000365698	0.00158447	0.00259179
g__	0.00103914	0.000446329	0.00186836	0.002075	0.00189573	0.00160686	0.000240442	0.000320924	0.00191939	0.000365698	0.00138641	0.00234496
Other	0.00034638	0.00200848	0.000180083	0.000148214	0	0.000267809	0.00456841	0.00304878	0	0	0.000198059	0.000246837
f__Burkholderiaceae	0.00103914	0.000669493	0.00272375	0.00133393	0.00056872	0.000267809	0.000240442	0.000481386	0.00607806	0.00255988	0.003367	0.00376427
g__Burkholderia	0.000692761	0.000223164	0.00110301	0.000592856	0.000189573	0.000267809	0	0.000481386	0.00159949	0.000914244	0.000792236	0.00148102
Other	0.00034638	0.000446329	0.00162075	0.00074107	0.000379147	0	0.000240442	0	0.00447857	0.00164564	0.00257477	0.00228325
f__Comamonadaceae	0.309318	0.292569	0.457613	0.430117	0.261043	0.220943	0.453955	0.45491	0.439219	0.482172	0.326005	0.394878
g__	0.00242466	0.00111582	0.000180083	0.00163035	0.00170616	0.00107124	0	0.00112323	0.000319898	0.00146279	0.000792236	0.000740512
g__Delftia	0.00034638	0.000669493	0.000450207	0.000148214	0.00056872	0.000535619	0.000480885	0.000320924	0.000159949	0.000548546	0.000198059	0.000617093
g__Limnohabitans	0.010045	0.00624861	0.0290384	0.0287535	0.0153555	0.0176754	0.0230825	0.0227856	0.0135956	0.0170049	0.00930877	0.0115396
g__Rhodoferax	0.0017319	0.00133899	0	0	0	0	0	0	0	0	0	0
Other	0.29477	0.283196	0.427944	0.399585	0.243412	0.20166	0.430392	0.43068	0.425144	0.463156	0.315706	0.381981
f__Oxalobacteraceae	0.383789	0.431377	0.142896	0.184378	0.538009	0.466256	0.365953	0.358151	0.175304	0.167307	0.300059	0.326998
g__	0.00277104	0.000446329	0.000315145	0.000444642	0.000379147	0	0.00240442	0.00192555	0.000319898	0.000731395	0.000990295	0.00148102
g__Polynucleobacter	0.380326	0.429592	0.141072	0.182451	0.536303	0.464381	0.362347	0.355584	0.174344	0.166027	0.296296	0.321382
g__Ralstonia	0.000692761	0.000223164	6.75311e-05	0.000148214	0.000189573	0	0.000240442	0	0	0	0.000198059	0.000246837
Other	0	0.00111582	0.00144066	0.00133393	0.00113744	0.00187467	0.00096177	0.000641849	0.000639795	0.000548546	0.00257477	0.00388769
Other	0	0.00133899	0.00189087	0.002075	0.00947867	0.00589181	0.000480885	0.00176508	0.000799744	0.000731395	0.00594177	0.00604752
Other	0	0.00133899	0.00189087	0.002075	0.00947867	0.00589181	0.000480885	0.00176508	0.000799744	0.000731395	0.00594177	0.00604752
o__Ellin6067	0	0.000669493	2.25104e-05	0	0	0	0.000480885	0.000320924	0	0	0	0
f__	0	0.000669493	2.25104e-05	0	0	0	0.000480885	0.000320924	0	0	0	0
g__	0	0.000669493	2.25104e-05	0	0	0	0.000480885	0.000320924	0	0	0	0
o__Methylophilales	0.00727399	0.0102656	0.0395732	0.0540981	0.0331754	0.0428495	0.0127434	0.0120347	0.0151951	0.018102	0.0126758	0.0170935
f__	0	0	0.00297137	0.00326071	0.0147867	0.0120514	0	0	0.00335893	0.00365698	0.00633789	0.00845418
g__	0	0	0.00297137	0.00326071	0.0147867	0.0120514	0	0	0.00335893	0.00365698	0.00633789	0.00845418
f__Methylophilaceae	0.00727399	0.0102656	0.0366018	0.0508374	0.0183886	0.0307981	0.0127434	0.0120347	0.0118362	0.0144451	0.00633789	0.00863931
g__	0.00727399	0.0102656	0.0366018	0.0508374	0.0183886	0.0307981	0.0127434	0.0120347	0.0118362	0.0144451	0.00633789	0.00863931
o__MND1	0.00034638	0.000446329	0	0	0.000189573	0.000267809	0.000721327	0.000802311	0	0	0	0
f__	0.00034638	0.000446329	0	0	0.000189573	0.000267809	0.000721327	0.000802311	0	0	0	0
g__	0.00034638	0.000446329	0	0	0.000189573	0.000267809	0.000721327	0.000802311	0	0	0	0
o__Neisseriales	0.00103914	0.00133899	0.00148568	0.00163035	0.00132701	0.00214247	0.00240442	0.00369063	0.00223928	0.00182849	0.00178253	0.00185128
f__Neisseriaceae	0.00103914	0.00133899	0.00148568	0.00163035	0.00132701	0.00214247	0.00240442	0.00369063	0.00223928	0.00182849	0.00178253	0.00185128
g__	0.00034638	0	0.000112552	0	0	0.000267809	0.000240442	0.000160462	0.000159949	0	0.000198059	0.000123419
Other	0.000692761	0.00133899	0.00137313	0.00163035	0.00132701	0.00187467	0.00216398	0.00353017	0.00207933	0.00182849	0.00158447	0.00172786
o__Procabacteriales	0.00103914	0.00111582	0.00279128	0.00385356	0.000758294	0.000267809	0.00216398	0.000802311	0.0110365	0.0127994	0.000792236	0.00135761
f__Procabacteriaceae	0.00103914	0.00111582	0.00279128	0.00385356	0.000758294	0.000267809	0.00216398	0.000802311	0.0110365	0.0127994	0.000792236	0.00135761
g__	0.00103914	0.00111582	0.00279128	0.00385356	0.000758294	0.000267809	0.00216398	0.000802311	0.0110365	0.0127994	0.000792236	0.00135761
o__Rhodocyclales	0.0647731	0.0738674	0.000270124	0.00074107	0.00056872	0.000803428	0.0062515	0.00609756	0.000319898	0.000182849	0.000198059	0.000246837
f__Rhodocyclaceae	0.0647731	0.0738674	0.000270124	0.00074107	0.00056872	0.000803428	0.0062515	0.00609756	0.000319898	0.000182849	0.000198059	0.000246837
g__	0.00034638	0.00111582	2.25104e-05	0.000148214	0	0	0	0.000320924	0	0	0.000198059	0
g__C39	0.0595774	0.0685115	4.50207e-05	0.000296428	0.000379147	0.000535619	0.00384708	0.0033697	0.000319898	0.000182849	0	0.000123419
g__Dechloromonas	0.00311742	0.00245481	4.50207e-05	0	0	0	0.000721327	0.00144416	0	0	0	0.000123419
g__Uliginosibacterium	0.00034638	0.000446329	4.50207e-05	0.000148214	0	0	0	0.000481386	0	0	0	0
Other	0.00138552	0.00133899	0.000112552	0.000148214	0.000189573	0.000267809	0.0016831	0.000481386	0	0	0	0
o__SBla14	0	0.000446329	6.75311e-05	0.000296428	0	0	0.000240442	0.000320924	0	0	0.000198059	0.000123419
f__	0	0.000446329	6.75311e-05	0.000296428	0	0	0.000240442	0.000320924	0	0	0.000198059	0.000123419
g__	0	0.000446329	6.75311e-05	0.000296428	0	0	0.000240442	0.000320924	0	0	0.000198059	0.000123419
o__SC-I-84	0.00034638	0	0.000157572	0	0	0	0	0	0	0	0	0
f__	0.00034638	0	0.000157572	0	0	0	0	0	0	0	0	0
g__	0.00034638	0	0.000157572	0	0	0	0	0	0	0	0	0
Other	0.000692761	0.00111582	0.00117054	0.00118571	0.00473934	0.00455276	0.00120221	0.000320924	0.000959693	0.00109709	0.0241632	0.0308547
Other	0.000692761	0.00111582	0.00117054	0.00118571	0.00473934	0.00455276	0.00120221	0.000320924	0.000959693	0.00109709	0.0241632	0.0308547
Other	0.000692761	0.00111582	0.00117054	0.00118571	0.00473934	0.00455276	0.00120221	0.000320924	0.000959693	0.00109709	0.0241632	0.0308547
c__Deltaproteobacteria	0.0249394	0.0180763	0.00490726	0.00592856	0.0056872	0.00696304	0.00601106	0.00770218	0.00431862	0.00420552	0.00831848	0.00839247
o__	0.000692761	0	2.25104e-05	0.000592856	0	0	0.000240442	0.000320924	0	0.000182849	0.000594177	0.000617093
f__	0.000692761	0	2.25104e-05	0.000592856	0	0	0.000240442	0.000320924	0	0.000182849	0.000594177	0.000617093
g__	0.000692761	0	2.25104e-05	0.000592856	0	0	0.000240442	0.000320924	0	0.000182849	0.000594177	0.000617093
o__[Entotheonellales]	0	0.000223164	4.50207e-05	0	0	0	0	0	0	0	0	0
f__[Entotheonellaceae]	0	0.000223164	4.50207e-05	0	0	0	0	0	0	0	0	0
g__	0	0.000223164	4.50207e-05	0	0	0	0	0	0	0	0	0
o__Bdellovibrionales	0.00311742	0.00178532	0.000990456	0.000889284	0.00227488	0.00187467	0.00144265	0.00144416	0.000639795	0.000548546	0.000990295	0.00160444
f__Bacteriovoracaceae	0.00103914	0.000892658	4.50207e-05	0	0	0	0.00096177	0.000320924	0	0.000182849	0	6.17093e-05
g__	0.00103914	0.000669493	2.25104e-05	0	0	0	0.00096177	0.000320924	0	0.000182849	0	6.17093e-05
g__Bacteriovorax	0	0	2.25104e-05	0	0	0	0	0	0	0	0	0
Other	0	0.000223164	0	0	0	0	0	0	0	0	0	0
f__Bdellovibrionaceae	0.00207828	0.000892658	0.000945435	0.000889284	0.00227488	0.00187467	0.000480885	0.00112323	0.000639795	0.000365698	0.000990295	0.00154273
g__	0	0	0	0	0.000379147	0	0	0	0.000319898	0	0	6.17093e-05
g__Bdellovibrio	0.00207828	0.000892658	0.000945435	0.000889284	0.00189573	0.00187467	0.000480885	0.00112323	0.000319898	0.000365698	0.000990295	0.00148102
o__Desulfarculales	0	0	2.25104e-05	0	0	0	0	0	0	0	0	0
f__Desulfarculaceae	0	0	2.25104e-05	0	0	0	0	0	0	0	0	0
g__Desulfarculus	0	0	2.25104e-05	0	0	0	0	0	0	0	0	0
o__Desulfobacterales	0.00034638	0.000446329	9.00414e-05	0	0	0	0.000480885	0.000641849	0	0	0	0
f__Desulfobacteraceae	0	0	0	0	0	0	0	0.000320924	0	0	0	0
g__	0	0	0	0	0	0	0	0.000320924	0	0	0	0
f__Desulfobulbaceae	0.00034638	0.000446329	6.75311e-05	0	0	0	0.000480885	0.000320924	0	0	0	0
g__	0	0.000223164	2.25104e-05	0	0	0	0.000240442	0.000320924	0	0	0	0
g__Desulfobulbus	0.00034638	0.000223164	0	0	0	0	0	0	0	0	0	0
Other	0	0	4.50207e-05	0	0	0	0.000240442	0	0	0	0	0
f__Nitrospinaceae	0	0	2.25104e-05	0	0	0	0	0	0	0	0	0
g__Nitrospina	0	0	2.25104e-05	0	0	0	0	0	0	0	0	0
o__Desulfovibrionales	0	0.000223164	0	0.000444642	0	0.000535619	0	0	0	0.000365698	0	0
f__Desulfovibrionaceae	0	0.000223164	0	0.000444642	0	0.000535619	0	0	0	0.000365698	0	0
g__	0	0	0	0	0	0.000535619	0	0	0	0.000182849	0	0
g__Desulfovibrio	0	0.000223164	0	0.000444642	0	0	0	0	0	0.000182849	0	0
o__Desulfuromonadales	0.0114306	0.00803392	0.000225104	0.000148214	0.000189573	0	0.000721327	0.00160462	0.000319898	0	0	0.000123419
f__Geobacteraceae	0.0114306	0.00803392	0.000225104	0.000148214	0.000189573	0	0.000721327	0.00160462	0.000319898	0	0	0.000123419
g__Geobacter	0.0114306	0.00803392	0.000225104	0.000148214	0.000189573	0	0.000721327	0.00160462	0.000319898	0	0	0.000123419
o__FAC87	0.00034638	0	0.000135062	0.000148214	0.000947867	0.000535619	0	0.000160462	0	0	0	0.000493675
f__	0.00034638	0	0.000135062	0.000148214	0.000947867	0.000535619	0	0.000160462	0	0	0	0.000493675
g__	0.00034638	0	0.000135062	0.000148214	0.000947867	0.000535619	0	0.000160462	0	0	0	0.000493675
o__MIZ46	0	0.00156215	0.00060778	0.00133393	0.00056872	0.00160686	0.000721327	0.00112323	0.00111964	0.00201134	0.00198059	0.00283863
f__	0	0.00156215	0.00060778	0.00133393	0.00056872	0.00160686	0.000721327	0.00112323	0.00111964	0.00201134	0.00198059	0.00283863
g__	0	0.00156215	0.00060778	0.00133393	0.00056872	0.00160686	0.000721327	0.00112323	0.00111964	0.00201134	0.00198059	0.00283863
o__Myxococcales	0.00692761	0.0031243	0.00123807	0.00118571	0.000758294	0.00107124	0.00144265	0.0012837	0.00127959	0.000548546	0.00237671	0.00178957
f__	0.00207828	0.000669493	0.000675311	0.00074107	0.000189573	0.000803428	0.000721327	0.000481386	0.00111964	0.000365698	0.00198059	0.000802222
g__	0.00207828	0.000669493	0.000675311	0.00074107	0.000189573	0.000803428	0.000721327	0.000481386	0.00111964	0.000365698	0.00198059	0.000802222
f__0319-6G20	0.000692761	0.000446329	6.75311e-05	0	0.000189573	0	0	0	0	0	0	0.000431965
g__	0.000692761	0.000446329	6.75311e-05	0	0.000189573	0	0	0	0	0	0	0.000431965
f__Cystobacterineae	0	0.000223164	2.25104e-05	0	0	0	0.000240442	0	0	0	0	6.17093e-05
g__	0	0.000223164	2.25104e-05	0	0	0	0.000240442	0	0	0	0	6.17093e-05
f__Haliangiaceae	0	0.000446329	0	0.000148214	0	0	0.000240442	0	0	0	0	6.17093e-05
g__	0	0.000446329	0	0.000148214	0	0	0.000240442	0	0	0	0	6.17093e-05
f__Myxococcaceae	0.00277104	0.000669493	0	0	0.000189573	0.000267809	0.000240442	0.000320924	0	0	0.000198059	6.17093e-05
g__Anaeromyxobacter	0.00277104	0.000669493	0	0	0.000189573	0.000267809	0.000240442	0.000320924	0	0	0.000198059	6.17093e-05
f__Polyangiaceae	0.00034638	0.000223164	0.000157572	0.000296428	0	0	0	0	0	0	0	0.000123419
g__	0.00034638	0.000223164	0.000157572	0.000296428	0	0	0	0	0	0	0	0.000123419
Other	0.00103914	0.000446329	0.000315145	0	0.000189573	0	0	0.000481386	0.000159949	0.000182849	0.000198059	0.000246837
Other	0.00103914	0.000446329	0.000315145	0	0.000189573	0	0	0.000481386	0.000159949	0.000182849	0.000198059	0.000246837
o__NB1-j	0	0	0	0	0	0	0	0	0	0	0	6.17093e-05
f__MND4	0	0	0	0	0	0	0	0	0	0	0	6.17093e-05
g__	0	0	0	0	0	0	0	0	0	0	0	6.17093e-05
o__NKB15	0	0	0	0	0	0	0	0.000160462	0	0	0	0
f__	0	0	0	0	0	0	0	0.000160462	0	0	0	0
g__	0	0	0	0	0	0	0	0.000160462	0	0	0	0
o__Spirobacillales	0.000692761	0.000892658	0.000292635	0.00074107	0.000758294	0.000803428	0.000721327	0.000320924	0.000319898	0.000182849	0.000594177	0.000617093
f__	0.000692761	0.000892658	0.000292635	0.00074107	0.000758294	0.000803428	0.000721327	0.000320924	0.000319898	0.000182849	0.000594177	0.000617093
g__	0.000692761	0.000892658	0.000292635	0.00074107	0.000758294	0.000803428	0.000721327	0.000320924	0.000319898	0.000182849	0.000594177	0.000617093
o__Sva0853	0	0	2.25104e-05	0.000296428	0	0	0	0	0	0	0.000198059	0
f__JTB36	0	0	2.25104e-05	0.000296428	0	0	0	0	0	0	0.000198059	0
g__	0	0	2.25104e-05	0.000296428	0	0	0	0	0	0	0.000198059	0
o__Syntrophobacterales	0.00138552	0.000223164	0.00114803	0.000148214	0	0.000267809	0.000240442	0.000320924	0.000639795	0	0.00158447	0.000246837
f__Syntrophaceae	0.000692761	0	2.25104e-05	0	0	0	0	0.000160462	0	0	0	0
g__	0.00034638	0	0	0	0	0	0	0.000160462	0	0	0	0
g__Desulfomonile	0.00034638	0	0	0	0	0	0	0	0	0	0	0
g__Syntrophus	0	0	2.25104e-05	0	0	0	0	0	0	0	0	0
f__Syntrophobacteraceae	0.00034638	0	0.00101297	0	0	0.000267809	0.000240442	0.000160462	0.000639795	0	0.00158447	0.000246837
g__	0	0	0.000900414	0	0	0.000267809	0.000240442	0.000160462	0.000639795	0	0.00158447	0.000246837
g__Syntrophobacter	0.00034638	0	0.000112552	0	0	0	0	0	0	0	0	0
f__Syntrophorhabdaceae	0.00034638	0.000223164	0.000112552	0.000148214	0	0	0	0	0	0	0	0
g__	0.00034638	0.000223164	0.000112552	0.000148214	0	0	0	0	0	0	0	0
Other	0	0.00156215	6.75311e-05	0	0.000189573	0.000267809	0	0.000320924	0	0.000365698	0	0
Other	0	0.00156215	6.75311e-05	0	0.000189573	0.000267809	0	0.000320924	0	0.000365698	0	0
Other	0	0.00156215	6.75311e-05	0	0.000189573	0.000267809	0	0.000320924	0	0.000365698	0	0
c__Epsilonproteobacteria	0.00034638	0.000223164	9.00414e-05	0	0	0	0	0.000641849	0	0	0	0
o__Campylobacterales	0.00034638	0.000223164	9.00414e-05	0	0	0	0	0.000641849	0	0	0	0
f__Campylobacteraceae	0.00034638	0.000223164	2.25104e-05	0	0	0	0	0.000160462	0	0	0	0
g__Arcobacter	0.00034638	0.000223164	0	0	0	0	0	0.000160462	0	0	0	0
g__Campylobacter	0	0	2.25104e-05	0	0	0	0	0	0	0	0	0
Other	0	0	6.75311e-05	0	0	0	0	0.000481386	0	0	0	0
Other	0	0	6.75311e-05	0	0	0	0	0.000481386	0	0	0	0
c__Gammaproteobacteria	0.0169726	0.018969	0.0222177	0.0272714	0.029763	0.0447242	0.00841548	0.00673941	0.0276711	0.024136	0.0344623	0.0298056
o__	0	0.000446329	0	0.000148214	0.000189573	0	0.000240442	0	0	0	0.000396118	0.000246837
f__	0	0.000446329	0	0.000148214	0.000189573	0	0.000240442	0	0	0	0.000396118	0.000246837
g__	0	0.000446329	0	0.000148214	0.000189573	0	0.000240442	0	0	0	0.000396118	0.000246837
o__Alteromonadales	0.000692761	0	0.000270124	0.000444642	0.000758294	0.000267809	0.000240442	0	0	0	0	0
f__Alteromonadaceae	0.00034638	0	0.000202593	0.000296428	0.000189573	0.000267809	0	0	0	0	0	0
g__Alteromonas	0	0	0.000135062	0	0.000189573	0	0	0	0	0	0	0
g__Marinobacter	0.00034638	0	6.75311e-05	0.000296428	0	0.000267809	0	0	0	0	0	0
f__Idiomarinaceae	0.00034638	0	6.75311e-05	0.000148214	0.00056872	0	0.000240442	0	0	0	0	0
g__Idiomarina	0.00034638	0	6.75311e-05	0.000148214	0.00056872	0	0.000240442	0	0	0	0	0
o__Enterobacteriales	0.00138552	0.00133899	0.000945435	0.00177857	0.000189573	0.000535619	0.00144265	0.000802311	0.000799744	0.000731395	0.000792236	0.00098735
f__Enterobacteriaceae	0.00138552	0.00133899	0.000945435	0.00177857	0.000189573	0.000535619	0.00144265	0.000802311	0.000799744	0.000731395	0.000792236	0.00098735
g__Erwinia	0	0	0	0	0	0	0	0	0.000159949	0	0	0
g__Morganella	0.00034638	0.000446329	0.00060778	0.00133393	0	0.000267809	0.000240442	0.000320924	0.000639795	0.000731395	0.000198059	0.000246837
Other	0.00103914	0.000892658	0.000337655	0.000444642	0.000189573	0.000267809	0.00120221	0.000481386	0	0	0.000594177	0.000740512
o__Legionellales	0.00762037	0.00937291	0.0036917	0.00592856	0.00473934	0.005624	0.00312575	0.00256739	0.00335893	0.00274273	0.0142602	0.0127738
f__	0.00103914	0.00133899	0.000382676	0.00148214	0.00056872	0.00107124	0.000240442	0.000481386	0.000159949	0	0.000594177	0.000863931
g__	0.00103914	0.00133899	0.000382676	0.00148214	0.00056872	0.00107124	0.000240442	0.000481386	0.000159949	0	0.000594177	0.000863931
f__Coxiellaceae	0.00484932	0.00535595	0.00227355	0.00237142	0.0028436	0.00267809	0.0016831	0.00112323	0.00239923	0.00164564	0.0104971	0.00882444
g__	0.0034638	0.00290114	0.00148568	0.00133393	0.00227488	0.00241028	0.00120221	0.000481386	0.00207933	0.00127994	0.00673401	0.00506017
g__Aquicella	0.00138552	0.00223164	0.00063029	0.000889284	0.00056872	0.000267809	0.000240442	0.000641849	0.000319898	0.000182849	0.003367	0.00283863
g__Rickettsiella	0	0	9.00414e-05	0	0	0	0.000240442	0	0	0.000182849	0.000198059	0.000493675
Other	0	0.000223164	6.75311e-05	0.000148214	0	0	0	0	0	0	0.000198059	0.000431965
f__Legionellaceae	0.0017319	0.00178532	0.000742842	0.00177857	0.000758294	0.00107124	0.000721327	0.000641849	0.000319898	0.000365698	0.00257477	0.00253008
g__	0	0	2.25104e-05	0	0	0	0	0	0	0	0	0
g__Legionella	0.000692761	0.000669493	0.000180083	0.0010375	0	0.000267809	0	0.000160462	0.000159949	0.000182849	0.000594177	0.000555384
g__Tatlockia	0.00034638	0.000446329	6.75311e-05	0.000148214	0	0.000267809	0.000240442	0	0	0	0.000198059	0.000493675
Other	0.000692761	0.000669493	0.000472717	0.000592856	0.000758294	0.000535619	0.000480885	0.000481386	0.000159949	0.000182849	0.00178253	0.00148102
Other	0	0.000892658	0.000292635	0.000296428	0.00056872	0.000803428	0.000480885	0.000320924	0.000479846	0.000731395	0.000594177	0.000555384
Other	0	0.000892658	0.000292635	0.000296428	0.00056872	0.000803428	0.000480885	0.000320924	0.000479846	0.000731395	0.000594177	0.000555384
o__Methylococcales	0.00138552	0.00156215	0.000337655	0.000296428	0	0	0.000480885	0.000481386	0.000479846	0.000365698	0	0.000246837
f__Crenotrichaceae	0.00034638	0	0	0	0	0	0	0	0	0	0	0
g__Crenothrix	0.00034638	0	0	0	0	0	0	0	0	0	0	0
f__Methylococcaceae	0.00103914	0.00156215	0.000337655	0.000296428	0	0	0.000480885	0.000481386	0.000479846	0.000365698	0	0.000246837
g__Methylocaldum	0.00034638	0	0.000247614	0	0	0	0.000240442	0.000160462	0.000479846	0.000182849	0	0.000123419
g__Methylomonas	0.000692761	0.00156215	9.00414e-05	0.000296428	0	0	0.000240442	0.000320924	0	0.000182849	0	0.000123419
o__Oceanospirillales	0	0	0.000225104	0.000148214	0	0.000535619	0	0	0	0	0	0
f__Halomonadaceae	0	0	0.000225104	0.000148214	0	0.000535619	0	0	0	0	0	0
g__Candidatus Portiera	0	0	0	0	0	0.000267809	0	0	0	0	0	0
g__Halomonas	0	0	0.000202593	0.000148214	0	0.000267809	0	0	0	0	0	0
Other	0	0	2.25104e-05	0	0	0	0	0	0	0	0	0
o__Pseudomonadales	0.00034638	0.000892658	0.000427697	0.00133393	0.00890995	0.0147295	0.000721327	0	0	0.000365698	0.00237671	0.00117248
f__Moraxellaceae	0	0.000223164	0.000135062	0.000444642	0.00189573	0.00348152	0.000480885	0	0	0	0.00237671	0.00092564
g__Acinetobacter	0	0.000223164	9.00414e-05	0.000296428	0.00189573	0.00241028	0.000480885	0	0	0	0.000792236	0.000370256
g__Perlucidibaca	0	0	4.50207e-05	0.000148214	0	0.00107124	0	0	0	0	0.00158447	0.000555384
f__Pseudomonadaceae	0.00034638	0.000669493	0.000292635	0.000889284	0.00701422	0.011248	0.000240442	0	0	0.000365698	0	0.000246837
g__Pseudomonas	0.00034638	0.000669493	0.000292635	0.000889284	0.00701422	0.011248	0.000240442	0	0	0.000365698	0	0.000246837
o__Thiotrichales	0	0	0.000157572	0.000296428	0	0	0	0	0	0	0	0
f__Piscirickettsiaceae	0	0	0.000157572	0.000296428	0	0	0	0	0	0	0	0
g__Methylophaga	0	0	0.000157572	0.000296428	0	0	0	0	0	0	0	0
o__Vibrionales	0	0	2.25104e-05	0	0.000189573	0.000267809	0	0	0	0	0	0
f__Vibrionaceae	0	0	2.25104e-05	0	0.000189573	0.000267809	0	0	0	0	0	0
g__Vibrio	0	0	2.25104e-05	0	0.000189573	0.000267809	0	0	0	0	0	0
o__Xanthomonadales	0.00450294	0.00513278	0.0156897	0.0157107	0.014218	0.0216926	0.00192354	0.00224647	0.0227127	0.0191991	0.0158447	0.0134526
f__Sinobacteraceae	0.00138552	0.00178532	0.0111651	0.00918927	0.00549763	0.00830209	0.000721327	0.000641849	0.00863724	0.00310843	0.0110913	0.00752854
g__	0.00138552	0.00156215	0.0111201	0.00904106	0.00549763	0.00776647	0.000721327	0.000641849	0.00863724	0.00292558	0.0108932	0.00684974
Other	0	0.000223164	4.50207e-05	0.000148214	0	0.000535619	0	0	0	0.000182849	0.000198059	0.000678803
f__Xanthomonadaceae	0.00311742	0.00334747	0.00452458	0.00652142	0.00872038	0.0133905	0.00120221	0.00160462	0.0140755	0.0160907	0.00475342	0.0059241
g__	0	0	9.00414e-05	0.000148214	0	0.000267809	0	0	0	0	0	0.000123419
g__Rhodanobacter	0	0	0.000292635	0	0.000189573	0.000535619	0	0	0.000159949	0.000365698	0.000792236	0.000493675
g__Stenotrophomonas	0.00311742	0.0031243	0.00402935	0.0063732	0.00853081	0.012587	0.00120221	0.00160462	0.0139155	0.015725	0.00376312	0.00524529
Other	0	0.000223164	0.000112552	0	0	0	0	0	0	0	0.000198059	6.17093e-05
Other	0.00103914	0.000223164	0.000450207	0.00118571	0.00056872	0.00107124	0.000240442	0.000641849	0.000319898	0.000731395	0.000792236	0.00092564
Other	0.00103914	0.000223164	0.000450207	0.00118571	0.00056872	0.00107124	0.000240442	0.000641849	0.000319898	0.000731395	0.000792236	0.00092564
Other	0.00103914	0.000223164	0.000450207	0.00118571	0.00056872	0.00107124	0.000240442	0.000641849	0.000319898	0.000731395	0.000792236	0.00092564
c__TA18	0.00034638	0.000223164	0.000112552	0	0	0	0	0.000320924	0	0	0	0
o__CV90	0	0.000223164	4.50207e-05	0	0	0	0	0	0	0	0	0
f__	0	0.000223164	4.50207e-05	0	0	0	0	0	0	0	0	0
g__	0	0.000223164	4.50207e-05	0	0	0	0	0	0	0	0	0
o__PHOS-HD29	0.00034638	0	6.75311e-05	0	0	0	0	0.000320924	0	0	0	0
f__	0.00034638	0	6.75311e-05	0	0	0	0	0.000320924	0	0	0	0
g__	0.00034638	0	6.75311e-05	0	0	0	0	0.000320924	0	0	0	0
Other	0.00103914	0	0.00105799	0.000592856	0.000379147	0.000267809	0.000480885	0.000641849	0.000479846	0.000365698	0.00138641	0.000370256
Other	0.00103914	0	0.00105799	0.000592856	0.000379147	0.000267809	0.000480885	0.000641849	0.000479846	0.000365698	0.00138641	0.000370256
Other	0.00103914	0	0.00105799	0.000592856	0.000379147	0.000267809	0.000480885	0.000641849	0.000479846	0.000365698	0.00138641	0.000370256
Other	0.00103914	0	0.00105799	0.000592856	0.000379147	0.000267809	0.000480885	0.000641849	0.000479846	0.000365698	0.00138641	0.000370256
p__SBR1093	0	0.000223164	0	0	0	0	0	0	0	0	0	0
c__VHS-B5-50	0	0.000223164	0	0	0	0	0	0	0	0	0	0
o__	0	0.000223164	0	0	0	0	0	0	0	0	0	0
f__	0	0.000223164	0	0	0	0	0	0	0	0	0	0
g__	0	0.000223164	0	0	0	0	0	0	0	0	0	0
p__Spirochaetes	0.00207828	0.00178532	6.75311e-05	0.000592856	0	0	0	0.000320924	0	0.000182849	0	0.000123419
c__[Brevinematae]	0.00034638	0	0	0.000148214	0	0	0	0	0	0	0	0
o__	0	0	0	0.000148214	0	0	0	0	0	0	0	0
f__	0	0	0	0.000148214	0	0	0	0	0	0	0	0
g__	0	0	0	0.000148214	0	0	0	0	0	0	0	0
o__[Brevinematales]	0.00034638	0	0	0	0	0	0	0	0	0	0	0
f__	0.00034638	0	0	0	0	0	0	0	0	0	0	0
g__	0.00034638	0	0	0	0	0	0	0	0	0	0	0
c__[Leptospirae]	0.000692761	0.000446329	0	0	0	0	0	0.000160462	0	0.000182849	0	0
o__[Leptospirales]	0.000692761	0.000446329	0	0	0	0	0	0.000160462	0	0.000182849	0	0
f__Sediment-4	0.000692761	0.000446329	0	0	0	0	0	0.000160462	0	0.000182849	0	0
g__SJA-88	0.000692761	0.000446329	0	0	0	0	0	0.000160462	0	0.000182849	0	0
c__MVP-15	0.00034638	0	0	0	0	0	0	0	0	0	0	0
o__PL-11B10	0.00034638	0	0	0	0	0	0	0	0	0	0	0
f__	0.00034638	0	0	0	0	0	0	0	0	0	0	0
g__	0.00034638	0	0	0	0	0	0	0	0	0	0	0
c__Spirochaetes	0.000692761	0.00133899	6.75311e-05	0.000444642	0	0	0	0.000160462	0	0	0	0.000123419
o__Spirochaetales	0.000692761	0.00133899	6.75311e-05	0.000444642	0	0	0	0.000160462	0	0	0	0.000123419
f__Spirochaetaceae	0.000692761	0.00133899	6.75311e-05	0.000444642	0	0	0	0.000160462	0	0	0	0.000123419
g__	0.00034638	0.000223164	2.25104e-05	0	0	0	0	0	0	0	0	0
g__Spirochaeta	0	0	4.50207e-05	0.000444642	0	0	0	0	0	0	0	0.000123419
g__Treponema	0.00034638	0.00111582	0	0	0	0	0	0.000160462	0	0	0	0
p__SR1	0	0	0	0	0	0	0.000240442	0.000641849	0	0	0	0
c__	0	0	0	0	0	0	0.000240442	0.000641849	0	0	0	0
o__	0	0	0	0	0	0	0.000240442	0.000641849	0	0	0	0
f__	0	0	0	0	0	0	0.000240442	0.000641849	0	0	0	0
g__	0	0	0	0	0	0	0.000240442	0.000641849	0	0	0	0
p__Tenericutes	0.000692761	0	6.75311e-05	0	0	0	0	0	0	0	0.000198059	0
c__Mollicutes	0.000692761	0	6.75311e-05	0	0	0	0	0	0	0	0.000198059	0
o__	0	0	0	0	0	0	0	0	0	0	0.000198059	0
f__	0	0	0	0	0	0	0	0	0	0	0.000198059	0
g__	0	0	0	0	0	0	0	0	0	0	0.000198059	0
o__Acholeplasmatales	0.00034638	0	0	0	0	0	0	0	0	0	0	0
Other	0.00034638	0	0	0	0	0	0	0	0	0	0	0
Other	0.00034638	0	0	0	0	0	0	0	0	0	0	0
o__Anaeroplasmatales	0.00034638	0	6.75311e-05	0	0	0	0	0	0	0	0	0
f__Anaeroplasmataceae	0.00034638	0	6.75311e-05	0	0	0	0	0	0	0	0	0
g__	0.00034638	0	0	0	0	0	0	0	0	0	0	0
g__Asteroleplasma	0	0	6.75311e-05	0	0	0	0	0	0	0	0	0
p__TM6	0.00658123	0.00870341	0.00693319	0.00918927	0.00436019	0.00428495	0.00408752	0.00256739	0.00191939	0.00237703	0.00812042	0.00820734
c__	0.00034638	0	0	0	0	0	0	0	0	0	0	0
o__	0.00034638	0	0	0	0	0	0	0	0	0	0	0
f__	0.00034638	0	0	0	0	0	0	0	0	0	0	0
g__	0.00034638	0	0	0	0	0	0	0	0	0	0	0
c__F38	0	0	0	0	0	0	0	0	0	0	0.000198059	0
o__	0	0	0	0	0	0	0	0	0	0	0.000198059	0
f__	0	0	0	0	0	0	0	0	0	0	0.000198059	0
g__	0	0	0	0	0	0	0	0	0	0	0.000198059	0
c__SBRH58	0.00207828	0.00200848	0.00177832	0.00385356	0.00056872	0.00214247	0.00240442	0.000962773	0.000319898	0.000182849	0.00277283	0.00246837
o__	0.00207828	0.00200848	0.00177832	0.00385356	0.00056872	0.00214247	0.00240442	0.000962773	0.000319898	0.000182849	0.00277283	0.00246837
f__	0.00207828	0.00200848	0.00177832	0.00385356	0.00056872	0.00214247	0.00240442	0.000962773	0.000319898	0.000182849	0.00277283	0.00246837
g__	0.00207828	0.00200848	0.00177832	0.00385356	0.00056872	0.00214247	0.00240442	0.000962773	0.000319898	0.000182849	0.00277283	0.00246837
c__SJA-4	0.00311742	0.00535595	0.00470466	0.00503928	0.0036019	0.00160686	0.00096177	0.00112323	0.00159949	0.00182849	0.00455536	0.00543042
o__	0.00242466	0.0037938	0.00364668	0.00429821	0.00341232	0.00133905	0.000721327	0.000641849	0.00127959	0.00164564	0.00415924	0.00450478
f__	0.00242466	0.0037938	0.00364668	0.00429821	0.00341232	0.00133905	0.000721327	0.000641849	0.00127959	0.00164564	0.00415924	0.00450478
g__	0.00242466	0.0037938	0.00364668	0.00429821	0.00341232	0.00133905	0.000721327	0.000641849	0.00127959	0.00164564	0.00415924	0.00450478
o__S1198	0.000692761	0.00133899	0.000562759	0.000592856	0.000189573	0	0	0	0.000319898	0.000182849	0.000198059	0.000555384
f__	0.000692761	0.00133899	0.000562759	0.000592856	0.000189573	0	0	0	0.000319898	0.000182849	0.000198059	0.000555384
g__	0.000692761	0.00133899	0.000562759	0.000592856	0.000189573	0	0	0	0.000319898	0.000182849	0.000198059	0.000555384
Other	0	0.000223164	0.000495228	0.000148214	0	0.000267809	0.000240442	0.000481386	0	0	0.000198059	0.000370256
Other	0	0.000223164	0.000495228	0.000148214	0	0.000267809	0.000240442	0.000481386	0	0	0.000198059	0.000370256
Other	0	0.000223164	0.000495228	0.000148214	0	0.000267809	0.000240442	0.000481386	0	0	0.000198059	0.000370256
Other	0.00103914	0.00133899	0.000450207	0.000296428	0.000189573	0.000535619	0.000721327	0.000481386	0	0.000365698	0.000594177	0.000308547
Other	0.00103914	0.00133899	0.000450207	0.000296428	0.000189573	0.000535619	0.000721327	0.000481386	0	0.000365698	0.000594177	0.000308547
Other	0.00103914	0.00133899	0.000450207	0.000296428	0.000189573	0.000535619	0.000721327	0.000481386	0	0.000365698	0.000594177	0.000308547
Other	0.00103914	0.00133899	0.000450207	0.000296428	0.000189573	0.000535619	0.000721327	0.000481386	0	0.000365698	0.000594177	0.000308547
p__TM7	0.00623485	0.00267797	0.000405186	0.000148214	0.000947867	0.00187467	0.0016831	0.00144416	0.000479846	0	0.00257477	0.00191299
c__	0	0.000223164	0	0	0	0	0	0	0	0	0	0
o__	0	0.000223164	0	0	0	0	0	0	0	0	0	0
f__	0	0.000223164	0	0	0	0	0	0	0	0	0	0
g__	0	0.000223164	0	0	0	0	0	0	0	0	0	0
c__SC3	0	0	0	0	0	0	0	0	0	0	0	6.17093e-05
o__	0	0	0	0	0	0	0	0	0	0	0	6.17093e-05
f__	0	0	0	0	0	0	0	0	0	0	0	6.17093e-05
g__	0	0	0	0	0	0	0	0	0	0	0	6.17093e-05
c__TM7-1	0.00242466	0.00156215	0.000360166	0.000148214	0.000189573	0.00187467	0.00120221	0.000481386	0.000479846	0	0.00237671	0.00166615
o__	0.00242466	0.00156215	0.000360166	0.000148214	0.000189573	0.00187467	0.00120221	0.000481386	0.000479846	0	0.00237671	0.00166615
f__	0.00242466	0.00156215	0.000360166	0.000148214	0.000189573	0.00187467	0.00120221	0.000481386	0.000479846	0	0.00237671	0.00166615
g__	0.00242466	0.00156215	0.000360166	0.000148214	0.000189573	0.00187467	0.00120221	0.000481386	0.000479846	0	0.00237671	0.00166615
c__TM7-3	0.0034638	0.000669493	2.25104e-05	0	0	0	0.000240442	0.000962773	0	0	0.000198059	0
o__Blgi18	0.00311742	0.000669493	2.25104e-05	0	0	0	0	0.000962773	0	0	0.000198059	0
f__	0.00311742	0.000669493	2.25104e-05	0	0	0	0	0.000962773	0	0	0.000198059	0
g__	0.00311742	0.000669493	2.25104e-05	0	0	0	0	0.000962773	0	0	0.000198059	0
Other	0.00034638	0	0	0	0	0	0.000240442	0	0	0	0	0
Other	0.00034638	0	0	0	0	0	0.000240442	0	0	0	0	0
Other	0.00034638	0	0	0	0	0	0.000240442	0	0	0	0	0
Other	0.00034638	0.000223164	2.25104e-05	0	0.000758294	0	0.000240442	0	0	0	0	0.000185128
Other	0.00034638	0.000223164	2.25104e-05	0	0.000758294	0	0.000240442	0	0	0	0	0.000185128
Other	0.00034638	0.000223164	2.25104e-05	0	0.000758294	0	0.000240442	0	0	0	0	0.000185128
Other	0.00034638	0.000223164	2.25104e-05	0	0.000758294	0	0.000240442	0	0	0	0	0.000185128
p__Verrucomicrobia	0.0117769	0.0102656	0.0776382	0.0738106	0.00379147	0.0117836	0.00408752	0.00914634	0.0934101	0.0912415	0.0382254	0.0196853
c__[Methylacidiphilae]	0.000692761	0.000223164	0.00063029	0.000889284	0.000189573	0.000803428	0	0.000320924	0.00175944	0.000182849	0.000396118	0.000555384
o__Methylacidiphilales	0.000692761	0.000223164	0.000427697	0.00074107	0.000189573	0	0	0	0.00159949	0.000182849	0.000396118	0.000555384
f__	0.000692761	0	0.000427697	0.00074107	0	0	0	0	0.00143954	0.000182849	0.000396118	0.000555384
g__	0.000692761	0	0.000427697	0.00074107	0	0	0	0	0.00143954	0.000182849	0.000396118	0.000555384
f__LD19	0	0.000223164	0	0	0.000189573	0	0	0	0.000159949	0	0	0
g__	0	0.000223164	0	0	0.000189573	0	0	0	0.000159949	0	0	0
o__S-BQ2-57	0	0	0.000202593	0.000148214	0	0.000803428	0	0.000320924	0.000159949	0	0	0
f__	0	0	0.000202593	0.000148214	0	0.000803428	0	0.000320924	0.000159949	0	0	0
g__	0	0	0.000202593	0.000148214	0	0.000803428	0	0.000320924	0.000159949	0	0	0
c__[Pedosphaerae]	0.00623485	0.00468645	0.0157798	0.0195643	0.00303318	0.00803428	0.00144265	0.00288832	0.024952	0.0274273	0.00574371	0.00506017
o__[Pedosphaerales]	0.00623485	0.00468645	0.0157798	0.0195643	0.00303318	0.00803428	0.00144265	0.00288832	0.024952	0.0274273	0.00574371	0.00506017
f__	0.000692761	0.000446329	0.000270124	0.00133393	0	0.000267809	0.000240442	0	0	0.000182849	0.000594177	0.000617093
g__	0.000692761	0.000446329	0.000270124	0.00133393	0	0.000267809	0.000240442	0	0	0.000182849	0.000594177	0.000617093
f__[Pedosphaeraceae]	0.0017319	0.000446329	0.000495228	0.000592856	0.000758294	0.00107124	0	0.000160462	0.000479846	0.000365698	0.000198059	0.000246837
g__Pedosphaera	0.0017319	0.000446329	0.000427697	0.000592856	0.000758294	0.00107124	0	0.000160462	0.000319898	0	0.000198059	0.000246837
Other	0	0	6.75311e-05	0	0	0	0	0	0.000159949	0.000365698	0	0
f__auto67_4W	0.00138552	0.00200848	0.0140465	0.017341	0.00227488	0.00535619	0.000480885	0.00240693	0.0243122	0.0266959	0.00376312	0.00376427
g__	0.00138552	0.00200848	0.0140465	0.017341	0.00227488	0.00535619	0.000480885	0.00240693	0.0243122	0.0266959	0.00376312	0.00376427
f__Ellin515	0.00103914	0.000446329	0.000360166	0.000148214	0	0.000267809	0.000240442	0.000320924	0.000159949	0.000182849	0.000198059	6.17093e-05
g__	0.00103914	0.000446329	0.000360166	0.000148214	0	0.000267809	0.000240442	0.000320924	0.000159949	0.000182849	0.000198059	6.17093e-05
f__R4-41B	0	0	2.25104e-05	0.000148214	0	0	0	0	0	0	0.000198059	6.17093e-05
g__	0	0	2.25104e-05	0.000148214	0	0	0	0	0	0	0.000198059	6.17093e-05
Other	0.00138552	0.00133899	0.000585269	0	0	0.00107124	0.000480885	0	0	0	0.000792236	0.000308547
Other	0.00138552	0.00133899	0.000585269	0	0	0.00107124	0.000480885	0	0	0	0.000792236	0.000308547
c__[Spartobacteria]	0.00484932	0.0037938	0.0608455	0.0524678	0.00056872	0.0029459	0.00192354	0.00561617	0.0663788	0.0634485	0.0320856	0.0139463
o__[Chthoniobacterales]	0.00484932	0.0037938	0.0608455	0.0524678	0.00056872	0.0029459	0.00192354	0.00561617	0.0663788	0.0634485	0.0320856	0.0139463
f__[Chthoniobacteraceae]	0.00484932	0.0037938	0.0608455	0.0524678	0.00056872	0.0029459	0.00192354	0.00561617	0.0663788	0.0634485	0.0320856	0.0139463
g__	0	0	2.25104e-05	0	0	0	0	0	0	0	0	0.000246837
g__Candidatus Xiphinematobacter	0.00415656	0.00245481	0.0571988	0.0517267	0.00056872	0.00160686	0.0016831	0.00433248	0.0647793	0.0627171	0.0277283	0.0120333
g__DA101	0	0.000446329	0.00315145	0.000148214	0	0.00107124	0.000240442	0.000481386	0.00111964	0.000182849	0.00396118	0.00148102
g__Ellin506	0.00034638	0.000223164	0.000315145	0.000148214	0	0	0	0.000160462	0	0.000365698	0.000198059	6.17093e-05
g__heteroC45_4W	0.00034638	0.000446329	4.50207e-05	0	0	0	0	0.000641849	0.000159949	0.000182849	0	6.17093e-05
Other	0	0.000223164	0.000112552	0.000444642	0	0.000267809	0	0	0.000319898	0	0.000198059	6.17093e-05
c__Verruco-5	0	0.00111582	0	0	0	0	0.000240442	0.000160462	0	0	0	0
o__WCHB1-41	0	0.00111582	0	0	0	0	0.000240442	0.000160462	0	0	0	0
f__	0	0.000892658	0	0	0	0	0.000240442	0.000160462	0	0	0	0
g__	0	0.000892658	0	0	0	0	0.000240442	0.000160462	0	0	0	0
Other	0	0.000223164	0	0	0	0	0	0	0	0	0	0
Other	0	0.000223164	0	0	0	0	0	0	0	0	0	0
c__Verrucomicrobiae	0	0.000223164	0.000180083	0.000592856	0	0	0.000240442	0.000160462	0.000159949	0.000182849	0	6.17093e-05
o__Verrucomicrobiales	0	0.000223164	0.000180083	0.000592856	0	0	0.000240442	0.000160462	0.000159949	0.000182849	0	6.17093e-05
f__Verrucomicrobiaceae	0	0.000223164	0.000180083	0.000592856	0	0	0.000240442	0.000160462	0.000159949	0.000182849	0	6.17093e-05
g__	0	0	4.50207e-05	0.000148214	0	0	0	0	0	0	0	0
Other	0	0.000223164	0.000135062	0.000444642	0	0	0.000240442	0.000160462	0.000159949	0.000182849	0	6.17093e-05
Other	0	0.000223164	0.000202593	0.000296428	0	0	0.000240442	0	0.000159949	0	0	6.17093e-05
Other	0	0.000223164	0.000202593	0.000296428	0	0	0.000240442	0	0.000159949	0	0	6.17093e-05
Other	0	0.000223164	0.000202593	0.000296428	0	0	0.000240442	0	0.000159949	0	0	6.17093e-05
Other	0	0.000223164	0.000202593	0.000296428	0	0	0.000240442	0	0.000159949	0	0	6.17093e-05
p__WPS-2	0.000692761	0.000446329	0.0026112	0.000148214	0.000379147	0.000803428	0	0	0.00335893	0.00127994	0.00356506	0.0026535
c__	0.000692761	0.000446329	0.0026112	0.000148214	0.000379147	0.000803428	0	0	0.00335893	0.00127994	0.00356506	0.0026535
o__	0.000692761	0.000446329	0.0026112	0.000148214	0.000379147	0.000803428	0	0	0.00335893	0.00127994	0.00356506	0.0026535
f__	0.000692761	0.000446329	0.0026112	0.000148214	0.000379147	0.000803428	0	0	0.00335893	0.00127994	0.00356506	0.0026535
g__	0.000692761	0.000446329	0.0026112	0.000148214	0.000379147	0.000803428	0	0	0.00335893	0.00127994	0.00356506	0.0026535
p__WS4	0	0.000223164	0	0	0	0	0	0	0.000159949	0.000182849	0	0
c__	0	0.000223164	0	0	0	0	0	0	0.000159949	0.000182849	0	0
o__	0	0.000223164	0	0	0	0	0	0	0.000159949	0.000182849	0	0
f__	0	0.000223164	0	0	0	0	0	0	0.000159949	0.000182849	0	0
g__	0	0.000223164	0	0	0	0	0	0	0.000159949	0.000182849	0	0
p__WS5	0.00727399	0.0031243	2.25104e-05	0	0	0	0.000240442	0.000160462	0	0	0	0
c__	0.00727399	0.0031243	2.25104e-05	0	0	0	0.000240442	0.000160462	0	0	0	0
o__	0.00727399	0.0031243	2.25104e-05	0	0	0	0.000240442	0.000160462	0	0	0	0
f__	0.00727399	0.0031243	2.25104e-05	0	0	0	0.000240442	0.000160462	0	0	0	0
g__	0.00727399	0.0031243	2.25104e-05	0	0	0	0.000240442	0.000160462	0	0	0	0
p__WS6	0	0	0	0	0	0	0	0.000160462	0	0	0	0
c__B142	0	0	0	0	0	0	0	0.000160462	0	0	0	0
o__	0	0	0	0	0	0	0	0.000160462	0	0	0	0
f__	0	0	0	0	0	0	0	0.000160462	0	0	0	0
g__	0	0	0	0	0	0	0	0.000160462	0	0	0	0
p__WWE1	0	0.000223164	0	0	0	0	0	0	0	0	0	0
c__[Cloacamonae]	0	0.000223164	0	0	0	0	0	0	0	0	0	0
o__[Cloacamonales]	0	0.000223164	0	0	0	0	0	0	0	0	0	0
f__SHA-116	0	0.000223164	0	0	0	0	0	0	0	0	0	0
g__	0	0.000223164	0	0	0	0	0	0	0	0	0	0
p__ZB3	0.000692761	0.000223164	0	0	0	0	0.000480885	0.000481386	0	0	0	0
c__	0.00034638	0.000223164	0	0	0	0	0	0.000320924	0	0	0	0
o__	0.00034638	0.000223164	0	0	0	0	0	0.000320924	0	0	0	0
f__	0.00034638	0.000223164	0	0	0	0	0	0.000320924	0	0	0	0
g__	0.00034638	0.000223164	0	0	0	0	0	0.000320924	0	0	0	0
c__BS119	0.00034638	0	0	0	0	0	0	0.000160462	0	0	0	0
o__	0.00034638	0	0	0	0	0	0	0.000160462	0	0	0	0
f__	0.00034638	0	0	0	0	0	0	0.000160462	0	0	0	0
g__	0.00034638	0	0	0	0	0	0	0.000160462	0	0	0	0
Other	0	0	0	0	0	0	0.000480885	0	0	0	0	0
Other	0	0	0	0	0	0	0.000480885	0	0	0	0	0
Other	0	0	0	0	0	0	0.000480885	0	0	0	0	0
Other	0	0	0	0	0	0	0.000480885	0	0	0	0	0
Unclassified	0	0	2.25104e-05	0	0	0	0	0	0	0	0	0
Total Geral	1	1	1	1	1	1	1	1	1	1	1	1
